# Supplementary material for: Characteristics of registered clinical trials assessing treatments for COVID-19: a cross-sectional analysis
Source: PubMed Central journal article supplement — BMJ Open. 2020 Jun 9;10(6):e039978. doi: 10.1136/bmjopen-2020-039978 (PMC7286283; doi:10.1136/bmjopen-2020-039978), 2020-06-09
Supplement: bmjopen-2020-039978.draft_revisions.pdf [file bmjopen-2020-039978.draft_revisions.pdf]

# BMJ Open

BMJ Open is committed to open peer review. As part of this commitment we make the peer review history of every article we publish publicly available.

When an article is published we post the peer reviewers' comments and the authors' responses online. We also post the versions of the paper that were used during peer review. These are the versions that the peer review comments apply to.

The versions of the paper that follow are the versions that were submitted during the peer review process. They are not the versions of record or the final published versions. They should not be cited or distributed as the published version of this manuscript.

BMJ Open is an open access journal and the full, final, typeset and author-corrected version of record of the manuscript is available on our site with no access controls, subscription charges or pay-per-view fees (<http://bmjopen.bmj.com>).

If you have any questions on BMJ Open's open peer review process please email [info.bmjopen@bmj.com](mailto:info.bmjopen@bmj.com)

# BMJ Open

## CHARACTERISTICS OF REGISTERED CLINICAL TRIALS ASSESSING TREATMENTS FOR COVID-19

|                               |                                                                                                                                                                                                                                                                                                                                                                               |
|-------------------------------|-------------------------------------------------------------------------------------------------------------------------------------------------------------------------------------------------------------------------------------------------------------------------------------------------------------------------------------------------------------------------------|
| Journal:                      | <i>BMJ Open</i>                                                                                                                                                                                                                                                                                                                                                               |
| Manuscript ID                 | bmjopen-2020-039978                                                                                                                                                                                                                                                                                                                                                           |
| Article Type:                 | Original research                                                                                                                                                                                                                                                                                                                                                             |
| Date Submitted by the Author: | 01-May-2020                                                                                                                                                                                                                                                                                                                                                                   |
| Complete List of Authors:     | Mehta, Hemalkumar; Johns Hopkins University Bloomberg School of Public Health, Epidemiology<br>Ehrhardt, Stephan ; Johns Hopkins University, Department of Epidemiology<br>Moore, Thomas ; Institute for Safe Medication Practices,<br>Segal, Jodi; Johns Hopkins University Bloomberg School of Public Health,<br>Alexander, G Caleb; Johns Hopkins University, Epidemiology |
| Keywords:                     | EPIDEMIOLOGY, PUBLIC HEALTH, INFECTIOUS DISEASES                                                                                                                                                                                                                                                                                                                              |
|                               |                                                                                                                                                                                                                                                                                                                                                                               |

SCHOLARONE™  
Manuscripts

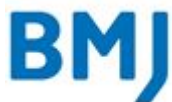

I, the Submitting Author has the right to grant and does grant on behalf of all authors of the Work (as defined in the below author licence), an exclusive licence and/or a non-exclusive licence for contributions from authors who are: i) UK Crown employees; ii) where BMJ has agreed a CC-BY licence shall apply, and/or iii) in accordance with the terms applicable for US Federal Government officers or employees acting as part of their official duties; on a worldwide, perpetual, irrevocable, royalty-free basis to BMJ Publishing Group Ltd ("BMJ") its licensees and where the relevant Journal is co-owned by BMJ to the co-owners of the Journal, to publish the Work in this journal and any other BMJ products and to exploit all rights, as set out in our [licence](#).

The Submitting Author accepts and understands that any supply made under these terms is made by BMJ to the Submitting Author unless you are acting as an employee on behalf of your employer or a postgraduate student of an affiliated institution which is paying any applicable article publishing charge ("APC") for Open Access articles. Where the Submitting Author wishes to make the Work available on an Open Access basis (and intends to pay the relevant APC), the terms of reuse of such Open Access shall be governed by a Creative Commons licence – details of these licences and which [Creative Commons](#) licence will apply to this Work are set out in our licence referred to above.

Other than as permitted in any relevant BMJ Author's Self Archiving Policies, I confirm this Work has not been accepted for publication elsewhere, is not being considered for publication elsewhere and does not duplicate material already published. I confirm all authors consent to publication of this Work and authorise the granting of this licence.

## CHARACTERISTICS OF REGISTERED CLINICAL TRIALS ASSESSING TREATMENTS FOR COVID-19

Hemalkumar B. Mehta, PhD<sup>1,2</sup>  
Stephan Ehrhardt, MD, MPH<sup>2</sup>  
Thomas J. Moore, AB<sup>3,4</sup>  
Jodi Segal, MD, MPH<sup>1,2,5</sup>  
G. Caleb Alexander, MD, MS<sup>1,2,5</sup>

1. Center for Drug Safety and Effectiveness, Johns Hopkins Bloomberg School of Public Health, Baltimore, Maryland
2. Department of Epidemiology, Johns Hopkins Bloomberg School of Public Health, Baltimore, Maryland
3. Institute for Safe Medication Practices, Alexandria, Virginia
4. Department of Epidemiology, Milken Institute of Public Health, George Washington University, Washington, DC
5. Department of Medicine, Johns Hopkins University School of Medicine, Baltimore, Maryland

### Support

None

### Disclosure

Dr. Alexander is past Chair of FDA's Peripheral and Central Nervous System Advisory Committee; has served as a paid advisor to IQVIA; is a co-founding Principal and equity holder in Monument Analytics, a health care consultancy whose clients include the life sciences industry as well as plaintiffs in opioid litigation; and is a member of OptumRx's National P&T Committee. This arrangement has been reviewed and approved by Johns Hopkins University in accordance with its conflict of interest policies. HBM, SE, TJM and JS have no disclosures to report.

### Correspondence

G. Caleb Alexander, MD, MS  
Johns Hopkins Bloomberg School of Public Health  
Department of Epidemiology  
615 N. Wolfe Street W6035  
Baltimore, MD 21205  
Phone: 410 955 8168  
Fax: 410 955 0863  
Email: [galexan9@jhmi.edu](mailto:galexan9@jhmi.edu)

### Length

Abstract 366; key points 119; text 2945; references 24; figures 2; efigures 1; tables 3; etables 1

**ABSTRACT**

**Objectives.** The SARS-CoV-2 (COVID-19) pandemic has prompted many initiatives to identify safe and efficacious treatments, yet little is known regarding where early efforts have focused. We aimed to characterize registered clinical trials assessing drugs or plasma treatments for COVID-19.

**Design, setting and participants.** Cross-sectional analysis of clinical trials for the treatment of COVID-19 that were registered in the United States or in countries contributing to the World Health Organization's International Clinical Trials Registry Platform (ICTR). Relevant trial entries of drugs or plasma were downloaded on March 26, 2020, de-duplicated, verified with reviews of major medical journals and World Health Organization websites and independently analyzed by two reviewers.

**Main outcome(s).** Trial intervention, sponsorship, critical design elements and specified outcomes

**Results.** Overall 201 clinical trials were registered for testing the therapeutic benefits of 92 drugs or plasma, including 64 in monotherapy and 28 different combinations. Only 8 (5.1%) products or combinations involved new molecular entities. The other test therapies had a wide range of prior medical uses, including as antivirals, antimalarials, immunosuppressants and oncology treatments. In 152 trials (75.7%) patients were randomized to treatment or comparator, including 55 trials with some form of blinding and 97 open label studies. The 49 (24.4%) of trials without a randomized design included 29 single armed studies, and 20 trials with some comparison group. Most trial designs featured multiple endpoints. Clinical endpoints were identified in 134 (66.7%) of trials and included COVID-19 symptoms, death, recovery, required intensive care and hospital discharge. Clinical scales were being used in 33 (16.4%) trials, most often measures of oxygenation and critical illness. Surrogate endpoints or biomarkers were studied in 88 (42.3%) of trials, primarily assays of viral load. Although the trials were initiated in more than 17 countries or regions, 100 (49.8%) were registered in China, and 78 (37.8%) in the U.S. Registered trials increased rapidly, with the number of registered trials doubling from March 1 to March 26, 2020.

**Conclusions.** While accelerating morbidity and mortality from the COVID-19 pandemic has been paralleled by early and rapid clinical investigation, many trials lack features to optimize their scientific value. Global coordination and increased funding of high-quality research may help to maximize scientific progress in rapidly discovering safe and effective treatments.

1  
2 77 **STRENGTHS AND LIMITATIONS**  
3

- 4 78 • We comprehensively assessed the World Health Organization's clinical trials registry network  
5 79 and US clinical trials to identify early clinical trials examining COVID-19 treatments  
6  
7 80 • In addition to identifying investigational therapies, we also characterized the sponsorship, critical design  
8 81 elements and specified outcomes of each registered clinical trial  
9  
10 82 • We also report the pharmacological mechanisms and clinical uses for drugs under investigation  
11  
12 83 • Our analyses was limited to clinical trials of drugs or plasma and many additional trials have  
13 84 been registered since our analysis was performed  
14  
15  
16  
17  
18  
19  
20  
21  
22  
23  
24  
25  
26  
27  
28  
29  
30  
31  
32  
33  
34  
35  
36  
37  
38  
39  
40  
41  
42  
43  
44  
45  
46  
47  
48  
49  
50  
51  
52  
53  
54  
55  
56  
57  
58  
59  
60

## INTRODUCTION

Since its identification in China in late 2019, the epidemic of severe acute respiratory syndrome coronavirus 2 (SARS-CoV-2) has spread rapidly, with 206 countries and territories reporting cases by April 2020.<sup>1</sup> Although knowledge of the coronavirus disease 2019 (COVID-19) pandemic's true epidemiology has been constrained by the limited availability of testing and surveillance, as of April 1, 2020 nearly one million cases had been confirmed around the world, with over 46,000 deaths and the number of new cases doubling as frequently as every few days.<sup>2</sup>

The impact of the pandemic, as well as uncertainty regarding its future course, has unleashed a wave of biomedical research to identify safe and effective treatments for COVID-19. While new molecular entities are under investigation, many therapies previously approved by regulators for the treatment of other diseases are also being evaluated for repurposing for viral suppression or for lessening the inflammatory consequences of infection.<sup>3</sup> There is also interest in assessing the use of convalescent plasma to treat COVID-19.<sup>4</sup>

Both media<sup>5</sup> and industry<sup>6,7</sup> reports have characterized products being assessed for therapeutic activity against COVID-19. We sought to complement these with a rigorous appraisal of early efforts around the world to identify safe and efficacious treatments to address the pandemic. In addition to identifying investigational therapies, we also characterized the sponsorship, critical design elements and specified outcomes of each registered clinical trial. While our analysis represents an early snapshot of a continually evolving area, it nevertheless provides timely and globally important information for researchers, policy-makers and the general public.

## METHODS

### Data Sources

We used information from the World Health Organization's (WHO) clinical trials registry network and ClinicalTrials.gov. ClinicalTrials.gov is a registry of public and privately funded clinical trials conducted around the world maintained by the United States (U.S.) National Library of Medicine on behalf of the National Institutes of Medicine. The WHO registry network includes clinical trials from countries including Australia, Brazil, China, South Korea, India, Cuba, European Union, Germany, Iran, Japan, Lebanon, Thailand, Netherlands, Pan Africa, Peru, Sri Lanka and the United Kingdom. Each participating country sends their data to the International Clinical Trials Registry Platform

(ICTRP) maintained by the WHO.<sup>8</sup> Both the WHO registry<sup>9</sup> and ClinicalTrials.gov<sup>10</sup> require that registered trials meet specific criteria for content, quality and validity, accessibility, unique identification, technical capacity and administration, and requirements of the International Committee of Medical Journal Editors.

### Registry Searches

We downloaded all COVID-19 trials provided by the WHO in a Microsoft Excel spread sheet.<sup>11</sup> The WHO curated all COVID-19 trials published on the ICTRP database in an excel file. Therefore, no search strategy was applied to the ICTRP database. We also performed a manual search of each of the WHO's seventeen network registries, such as EU Clinical trials register to identify additional trials, yielding 21 additional studies. We combined these data with information from the ClinicalTrials.gov registry.<sup>12</sup> All searches were last updated on March 26, 2020. To identify trials registered in the U.S., we searched the ClinicalTrials.gov registry for trials related to the 2019 novel coronavirus using keywords "Coronavirus" or "COVID-19" or "COVID19" or "2019 novel coronavirus" or "2019-nCoV" or "SARS-CoV-2" (**eTable 1**). In order to assess whether there were omitted trials, we also searched major medical journals, such as Lancet, New England Journal of Medicine and JAMA, and websites from the World Health Organization, U.S. Centers for Disease Control and Prevention and media aggregators. These searches did not reveal any additional trials to be included in the analysis.

For each product that that was approved by regulators, we searched for information from the European Medicines Agency (EMA)<sup>13</sup> and U.S. Food and Drug Administration (FDA)<sup>14</sup> describing mechanisms of action and approved indications. We searched the pharmaceutical manufacturers' websites and other online sources for information about drugs that were not approved in the European Union or the United States.

### Trial Selection

We included all studies conducted on patients diagnosed with COVID-19. First, we selected interventional clinical trials based on the "study type" variable (**eFigure 1**). This variable contains values such as interventional trials, observational studies, expanded access, diagnostic test, basic science, prevention, prognosis, epidemiological research, health services research and screening. Interventional studies are "studies that prospectively assign human participants or groups of humans to one or more health-related interventions to evaluate the effects on health outcomes".<sup>15,16</sup> To be



1  
2 150 inclusive of all trials on drugs and plasma, we did not limit our inclusion criteria to randomized trials.  
3  
4 151 Second, we included studies where drugs or plasma was the primary intervention. Since there was not  
5  
6 152 standardized information about the components of each intervention, two individuals (KM, HM)  
7  
8 153 independently reviewed each interventional study to identify any trials of a drug or plasma. Any  
9  
10 154 disagreement was resolved by a third reviewer (GCA). Because study focus was on evaluating drugs  
11  
12 155 or plasma treatments, we excluded trials of stem cell transplants, devices, diagnostic tests, traditional  
13  
14 156 Chinese medicines/herbal medicine, rehabilitation, dietary supplements and psychological  
15  
16 157 interventions. We did not limit any studies based on the outcomes they evaluated. We also excluded  
17  
18 158 one trial with implausible information regarding its study design (a single-arm randomized controlled  
19  
20 159 trial).

### 21 161 **Data extraction and management**

22  
23 162 We extracted the following information from each trial: unique trial number; trial registry source  
24  
25 163 (WHO network registry country or the U.S.), registration date, recruitment status (recruiting, not yet  
26  
27 164 recruiting, withdrawn or cancelled), recruitment country, phase (0, 1, 2, 3, 4, 1-2, 2-3, not applicable,  
28  
29 165 missing), anticipated enrolment, lead sponsor, allocation status (randomized, non-randomized),  
30  
31 166 intervention model (single-arm, parallel, cross-over, factorial, platform trial, sequential), blinding  
32  
33 167 (open, single, double, triple, quadruple,), primary outcome (surrogate/biomarker, clinical scale, clinical  
34  
35 168 outcome) and a website address. Trials that reported recruitment status of completed, active or  
36  
37 169 enrolling by invitation were grouped as recruiting. We used the country address of each facility (i.e., a  
38  
39 170 site that can potentially enroll participants) to identify recruitment countries. Enrolment number  
40  
41 171 reflects the estimated total number of participants to be enrolled or the actual total number of  
42  
43 172 participants enrolled.

44  
45 174 We used the primary sponsor and collaborators fields from the U.S. registry, and primary and  
46  
47 175 secondary sponsor fields from the WHO registry to identify the probable lead sponsor. We classified  
48  
49 176 sponsorship as follows: (i) the lead sponsor was considered to be a pharmaceutical company if the  
50  
51 177 primary sponsor was a pharmaceutical company, or a known funding body like the National Institutes  
52  
53 178 of Health (NIH) was neither a primary sponsor or collaborators/secondary sponsor, and at least one  
54  
55 179 collaborator was a pharmaceutical company; (ii) the lead sponsor was a known government research  
56  
57 180 funding agency if identified as such or at least one collaborator was this funder; (iii) the lead sponsor  
58  
59 181 was a hospital if so stated; (iv) all others were classified as other. For some trials, the study design or

1  
2 182 blinding was unclear. In such cases, two reviewers (HM, SE) independently reviewed the registry  
3  
4 183 record in detail and extracted the information. If, after in depth review, study design was still unclear  
5  
6 184 (n=37), we used the following rules to assign intervention model and blinding: (i) trials with a single  
7 185 group were considered as non-randomized and open-label;<sup>17</sup> (ii) trials that reported more than one  
8  
9 186 group were considered having a parallel group design; (iii) trials were considered open-label if blinding  
10  
11 187 was not reported and could not be inferred. We grouped parallel, cross-over, factorial, platform, and  
12 188 sequential intervention trials as multi-arm (>2 trial arms).  
13

14 189  
15  
16 190 Two reviewers (HM, TM) independently reviewed primary outcomes of all trials and assigned them as  
17  
18 191 surrogate or biomarker, clinical scale, or clinical outcomes. Surrogate or biomarker included any  
19 192 measure of SARS-Cov-2 or any blood test; clinical scales included measures of oxygenation,  
20  
21 193 Sequential Organ Failure Assessment (SOFA) score, National Early Warning Score 2 (NEWS2) score,  
22  
23 194 lung injury score or any measure of pulmonary harms; and clinical outcomes included symptoms,  
24 195 clinical improvement scores, intubation, hospitalization or death. Reviewer disagreement was resolved  
25  
26 196 by discussion and consensus.  
27

28 197  
29  
30 198 We identified drugs under investigation for COVID-19 from the experimental and/or control arm of  
31 199 each trial, including multiple drugs when they were studied in combination. Because the trial registries  
32  
33 200 did not record drugs in a standardized format, two pharmacist reviewers (HM, SS) independently  
34  
35 201 extracted this information, converting brand names were scientific names and correcting minor spelling  
36  
37 202 errors. We used the WHO's Anatomical Therapeutic Chemical Classification System to classify drugs  
38 203 in major therapeutic or pharmacological subgroups. For the 18 drugs (e.g., remdesivir) that were not  
39  
40 204 included in the WHO's ATC algorithms, we used product information from the European Medicines  
41  
42 205 Agency, U.S. FDA or the companies' websites to characterize the product.  
43

## 44 206

### 45 207 **Analysis**

46

47 208 We used descriptive statistics to analyze the extracted data. We summarized the characteristics of all  
48  
49 209 included trials using frequency and percentages. We listed unique drugs under investigation and the  
50 210 number of registered clinical trials for each product. We plotted the number of cumulative trials by  
51  
52 211 their registration date. All data was extracted and stored in an open-access Google Sheet document  
53  
54 212 ([Link](#)). The study was considered non-human subject research by the Johns Hopkins University  
55  
56 213 Institutional Review Board. We used SAS version 9.4 (SAS Institute Inc.) for all analyses.  
57

## Patient and public involvement

While we did not directly involve patients in the design or conduct of our investigation, our analyses were motivated by a belief that it is important for patients, and the general public, to have accessible, high-quality information regarding the structure and outcomes of clinical trials assessing therapeutics targeting COVID-19.

## RESULTS

### Characteristics of Clinical Trials

Overall 201 clinical trials were registered for testing the therapeutic benefits of 156 drugs or plasma, including 62 in monotherapy and 92 different combinations (**Table 1**). Although the trials were initiated in more than 17 countries or regions, 100 (49.8%) were registered in China, and 78 (37.8%) in the U.S. Of the 201 trials, 4 (2.0%) were registered in January 2020, 97 (48.2%) in February and 100 (49.8%) between March 1<sup>st</sup> and March 26, 2020 (**Figure 1**). Nearly 60% of the trials were recruiting patients, and more than half were sponsored by hospitals or universities (55.2%), while about one in five were sponsored by a government (19.4%) and a similar proportion (17.9%) were industry sponsored.

In 152 trials (75.7%) patients were randomized to treatment or comparator, including 55 trials with some form of blinding and 97 open label studies (**Figure 2**). The 49 (24.4%) of trials without a randomized design included 29 single armed studies, and 20 trials with some comparison group. Of the 201 trials, 54 (26.9%) were parallel group, randomized controlled trials with at least single-blinding.

### Primary Endpoints

Most trial designs featured multiple endpoints. Clinical endpoints were identified in 134 (66.7%) of trials and included COVID-19 symptoms, death, recovery, required intensive care and hospital discharge. Clinical scales were being used in 33 (16.4%) trials, most often measures of oxygenation and critical illness assessment instruments. Surrogate endpoints or biomarkers were studied in 88 (42.3%) of trials, primarily assays of viral load. None of the trials assessed patient and public involvement or quality of life as outcome measures.

### Study Size

1  
2 247 Overall, the studies projected enrolling a median (IQR) of 100 (IQR, 50-240) patients. Notably 54  
3  
4 248 (26.9%) of trials sought to enroll 50 or fewer patients. At the other extreme, 94 (46.8%) trials sought to  
5  
6 249 enroll 100 or more patients, with 20 (9.6%) studies anticipating enrollment of 500 or more patients.  
7  
8

### 9 251 **Therapies Under Evaluation**

10  
11 252 Overall 92 drugs or plasma were under investigation, including 64 in monotherapy and 28 different  
12  
13 253 combinations (**Table 2**). Only 8 (5.1%) products or combinations involved new molecular entities. The  
14  
15 254 other test therapies had a wide range of prior medical uses; 412 (18.8%) were antivirals, 9 (14.1%)  
16  
17 255 immunosuppressants other than corticosteroids, 4 anticancer drugs (6.3%) 3 (4.7%) antimalarials, 2  
18  
19 256 (3.1%) corticosteroids, 2 (3.1%) immunostimulants and 2 (3.1%) antithrombotic agents. The 28  
20  
21 257 different combinations including antivirals, antimalarials, immunosuppressants, immunostimulants and  
22  
23 258 antibacterials (**Table 3**). Of these, nine (32%) were antimalarial/antiviral combinations, seven (25%)  
24  
25 259 antiviral/immunosuppressant combination and six (21%) antiviral/interferon combination.  
26  
27

### 27 262 **DISCUSSION**

28  
29 263 This study characterized the scope, objectives, and content of the current global research program to  
30  
31 264 find effective therapies for COVID-19 as reported to the leading clinical trial registries. These data  
32  
33 265 show that the primary focus of clinical trial research at present is assess whether a wide range of  
34  
35 266 existing therapeutic products might also be effective against acute illnesses caused by the novel SARS-  
36  
37 267 Cov-2 virus. Because one-third of trials exclude clinical endpoints, nearly one half are designed to  
38  
39 268 enroll fewer than 100 patients and two-thirds are open label, many of these studies are likely to yield  
40  
41 269 only preliminary evidence of a given treatment's safety and effectiveness against COVID-19.  
42

42 270  
43  
44 271 Our results indicate that current scientific activity is concentrated in China and the United States,  
45  
46 272 accounting for 87.6% of the studies. Some of the products under investigation, such as remdesivir, have  
47  
48 273 considerable pre-clinical and clinical evidence to support their potential value. In addition to single site  
49  
50 274 trials, several major, multi-site trials of therapies against COVID-19 are also underway. *Solidarity*,  
51  
52 275 announced by the World Health Organization on March 20, 2020, is a multi-center, adaptive,  
53  
54 276 randomized, open-label, five arm trial testing remdesivir, chloroquine/hydroxychloroquine,  
55  
56 277 ritonavir/lopinavir and ritonavir/lopinavir with interferon-beta against standard of care in dozens of  
57  
58 278 countries around the globe.<sup>18</sup> *Discovery*, coordinated by France's National Institute of Health and  
59  
60 279 Medical Research (Inserm), is designed as an add-on trial in Europe and will study the same drugs with

1  
2 280 the exclusion of chloroquine.<sup>19</sup> The vast majority of test therapies have been approved for other uses,  
3  
4 281 although 8 new molecular entities are being assessed, a number that is likely to grow as governments  
5  
6 282 and industry invest in new compounds during the coming months.  
7  
8 283

9 284 Our findings provide reason for both optimism and caution. Many registered COVID-19 trials have  
10  
11 285 been designed expediently, and while case series and single-arm trials have value and may provide  
12  
13 286 early signals, randomized study designs provide higher quality evidence and will maximize chances for  
14  
15 287 finding effective and safe treatments during this wave of the pandemic. These trial designs, however,  
16  
17 288 need adequate funding as well as scientific leadership, especially as frontline clinicians are tasked with  
18  
19 289 saving lives. In addition, it is important that surrogate outcomes, biomarkers or clinical scales are  
20  
21 290 strongly and directly linked to what matters most for providers and patients, improved chances of  
22  
23 291 recovery from COVID-19.<sup>20,21</sup>

24 293 This study provides early evidence of the benefits of global registries to characterize urgent clinical  
25  
26 294 trial research questions now under investigation. Used wisely by active researchers, these registries can  
27  
28 295 help to identify the most promising avenues for developing new therapies, avoid unnecessary  
29  
30 296 duplication, and define unanswered questions that inevitably arise from early research. The registries  
31  
32 297 also constitute a focal point for developing a more comprehensive program to share protocols and  
33  
34 298 research results. Given the early use of pre-prints prior to peer review and multiple journals publishing  
35  
36 299 results, the global research enterprise needs to enlarge and extend the cooperative effort initiated by  
37  
38 300 these registries.

### 39 40 302 **Limitations**

41  
42 303 Our analysis was limited to a cross-sectional review of trials registered early in the pandemic with one  
43  
44 304 half the studies registered in the previous month. Many of these studies appeared to be exploratory and  
45  
46 305 not explicitly powered to test a specific drug effect on a pre-specified primary endpoint. In addition,  
47  
48 306 our assessment was limited to drugs and plasma, rather than other treatment modalities under  
49  
50 307 investigation. We did not include trials from Health Canada's Clinical Trials Database because this  
51  
52 308 database does not provide relevant details on trial characteristics. However, if trials are reported in US  
53  
54 309 or WHO database, they are included in our study. We did not apply Standard Protocol Items:  
55  
56 310 Recommendations for Interventional Trials (SPIRIT) guideline to evaluate overall quality of clinical  
57  
58 311 trials protocol. Future research can evaluate quality of clinical trials for COVID-19. Finally, our

1  
2 312 analysis is only as good as the data that it is based on; the International Clinical Trials Registry  
3  
4 313 Platform (ICTRP) gathers information from more than a dozen contributing countries and despite its  
5  
6 314 value, there remain opportunities to improve the consistency and quality of submitted data from both  
7 315 this platform<sup>22</sup> and ClinicalTrials.gov.<sup>23</sup>  
8

## 9 316 **CONCLUSIONS**

10 317  
11 The global pandemic has galvanized the world's research community, and there are signs of  
12 318 remarkable scientific activity.<sup>24</sup> In this review of clinical trials registered early in course of the  
13 319 pandemic's first wave, we found evidence of rapid clinical investigation of existing antivirals,  
14 320 antimalarials, immunosuppressants and oncology treatments for repurposing against COVID-19.  
15 321  
16 322 Despite this, many registered trials lack features to optimize their scientific value. Global coordination  
17 323 and increased funding of high-quality research may help to maximize scientific progress in rapidly  
18 324 discovering safe and effective treatments.  
19  
20  
21  
22  
23  
24  
25  
26  
27  
28  
29  
30  
31  
32  
33  
34  
35  
36  
37  
38  
39  
40  
41  
42  
43  
44  
45  
46  
47  
48  
49  
50  
51  
52  
53  
54  
55  
56  
57  
58  
59  
60

1

2 325 **ACKNOWLEDGEMENTS**

3

4 326 The authors gratefully acknowledge Kristin Meek, Matthew Tajanlangit and Jamie Heyward for  
5 327 assistance extracting information from trial registries and Sneha Sura for assistance reviewing drug  
6 328 information and data management.

8

9 329

10

11 330 It was not appropriate or possible to involve patients or the public in the design, or conduct, or  
12 331 reporting, or dissemination plans of our research.

13

14 332

15

16 333

17 334

18 335

19 336

20

21

22

23

24

25

26

27

28

29

30

31

32

33

34

35

36

37

38

39

40

41

42

43

44

45

46

47

48

49

50

51

52

53

54

55

56

57

58

59

60

337 **Table 1.** Characteristics of Registered Clinical Trials for SARS-CoV-2 Infection (n=201 trials).

| Clinical Trial Characteristics          | Total trials (N = 201) |
|-----------------------------------------|------------------------|
| Trial intervention, n (%)               |                        |
| Drug                                    | 188 (93.5)             |
| Plasma                                  | 13 (6.5)               |
| Trial registry source, n (%)            |                        |
| China                                   | 100 (49.8)             |
| United States                           | 76 (37.8)              |
| Europe Union                            | 9 (4.5)                |
| Iran                                    | 10 (5.0)               |
| Japan                                   | 4 (2.0)                |
| ISRCTN                                  | 2 (1.0)                |
| Status, n (%)                           |                        |
| Recruiting                              | 120 (59.7)             |
| Not yet recruiting                      | 75 (37.3)              |
| Withdrawn                               | 6 (3.0)                |
| Recruitment country, <sup>a</sup> n (%) |                        |
| China                                   | 126 (53.9)             |
| Europe                                  | 31 (13.3)              |
| Asia (Except China)                     | 18 (7.7)               |
| North America                           | 17 (7.3)               |
| Middle East                             | 13 (5.6)               |
| South America                           | 6 (2.6)                |
| Africa                                  | 1 (0.4)                |
| Not reported                            | 22 (9.4)               |
| Phase, n (%)                            |                        |
| 0                                       | 37 (18.4)              |
| 1 or 1/2                                | 5 (2.5)                |
| 2                                       | 32 (15.9)              |
| 2/3                                     | 16 (8.0)               |
| 3                                       | 33 (16.4)              |
| 4                                       | 51 (24.9)              |
| Not applicable                          | 26 (12.9)              |
| Missing                                 | 2 (1.0)                |
| Lead sponsor, n (%)                     |                        |
| Hospitals                               | 111 (55.2)             |
| Industry                                | 36 (17.9)              |
| Government                              | 39 (19.4)              |
| Other <sup>b</sup>                      | 7 (3.5)                |
| Not reported                            | 8 (4.0)                |

<sup>a</sup>Percentages may exceed 100% as categories not mutually exclusive

<sup>b</sup>Includes foundations and disease trial networks

**ISRCTN** International Standard Randomised Controlled Trial Number

Sources: World Health Organization and ClinicalTrials.gov (as of March 26, 2020)



1  
2 339 **Table 1 (con't)**

3 340

| Anticipated enrolment, n (%) |              |
|------------------------------|--------------|
| Median (IQR)                 | 100 (50-240) |
| ≤50                          | 54 (26.9)    |
| 51-100                       | 53 (26.4)    |
| ≥100                         | 94 (46.8)    |
| Outcome, <sup>a</sup> n (%)  |              |
| Surrogate/biomarker          | 85 (42.3)    |
| Clinical scale               | 33 (16.4)    |
| Clinical outcome             | 134 (66.7)   |

4  
5  
6  
7  
8  
9  
10  
11  
12  
13  
14

15 341  
16 342  
17 343  
18 344  
19

For peer review only

20  
21  
22  
23  
24  
25  
26  
27  
28  
29  
30  
31  
32  
33  
34  
35  
36  
37  
38  
39  
40  
41  
42  
43  
44  
45  
46  
47  
48  
49  
50  
51  
52  
53  
54  
55  
56  
57  
58  
59  
60

**Table 2.** Products Being Assessed in Registered Clinical Trials for SARS-COV-2 Infection.

| Major drug class and drugs                          | Registered trials, N <sup>a</sup> | Pharmacologic mechanism                                                                                                                                      | Clinical Uses                                                                                                                        |
|-----------------------------------------------------|-----------------------------------|--------------------------------------------------------------------------------------------------------------------------------------------------------------|--------------------------------------------------------------------------------------------------------------------------------------|
| <b>Antimalarials</b>                                | <b>50</b>                         |                                                                                                                                                              |                                                                                                                                      |
| Chloroquine or hydroxychloroquine                   | 49                                | Inhibit certain enzymes by interacting with DNA; possible antiviral effect on SARS-CoV through changing the glycosylation of ACE2 receptor and spike protein | Malaria, extraintestinal amebiasis, lupus erythematosus, rheumatoid Arthritis                                                        |
| Dihydroartemisinin/piperazine                       | 1                                 | Blocks a step in <i>P. falciparum</i> parasite's metabolism needed for its survival                                                                          | Malaria                                                                                                                              |
| <b>Antivirals<sup>b</sup></b>                       | <b>67</b>                         |                                                                                                                                                              |                                                                                                                                      |
| Asc09/ritonavir                                     | 2                                 | HIV-1 protease inhibitor                                                                                                                                     | Investigational drug for HIV (China)                                                                                                 |
| Azvidine                                            | 4                                 | Reverse transcriptase inhibitor                                                                                                                              | Investigational drug for HIV-1                                                                                                       |
| Baloxavir                                           | 2                                 | Polymerase acidic (PA) endonuclease inhibitor                                                                                                                | Influenza                                                                                                                            |
| Danoprevir/ritonavir                                | 4                                 | Danoprevir inhibits hepatitis virus C NS3/4A protease inhibitor;                                                                                             | Investigational drug for Hepatitis C                                                                                                 |
| Darunavir/cobicistat                                | 1                                 | Darunavir inhibits HIV-1 protease enzyme, thus slowing down multiplication of HIV                                                                            | HIV-1                                                                                                                                |
| Favipiravir                                         | 11                                | Inhibits RNA polymerase and prevents replication of the viral genome                                                                                         | Influenza (Japan)                                                                                                                    |
| Lopinavir/ritonavir                                 | 16                                | Lopinavir inhibits HIV-1 protease enzyme, thus slowing down multiplication of HIV                                                                            | HIV-1                                                                                                                                |
| Remdesivir                                          | 10                                | Nucleoside analogue; inhibit the action of RNA polymerase; tested for Ebola, MERS, SARS                                                                      | None; investigational medicine                                                                                                       |
| Ribavirin                                           | 1                                 | Inhibition of viral RNA and protein synthesis                                                                                                                | Hepatitis C                                                                                                                          |
| Oseltamivir                                         | 2                                 | Inhibitor of influenza virus neuraminidase affecting release of viral particles                                                                              | Influenza                                                                                                                            |
| Umifenovir                                          | 6                                 | Inhibits membrane fusion in influenza virus                                                                                                                  | Influenza (Russia and China)                                                                                                         |
| Sofosbuvir/ledipasvir                               | 1                                 | Sofosbuvir inhibits HCV NS5B RNA; ledipasvir inhibits HCV NS5A inhibitor                                                                                     | Hepatitis C                                                                                                                          |
| <b>Different antiviral combinations<sup>c</sup></b> | <b>7</b>                          |                                                                                                                                                              |                                                                                                                                      |
| <b>Immunosuppressants</b>                           | <b>27</b>                         |                                                                                                                                                              |                                                                                                                                      |
| Adalimumab                                          | 1                                 | Blocks tumor necrosis factor – $\alpha$ , thereby reducing inflammation and other symptoms of the disease                                                    | Rheumatoid arthritis, psoriatic arthritis, Juvenile idiopathic arthritis, Crohn's disease, axial spondyloarthritis, Plaque psoriasis |
| Baricitinib                                         | 2                                 | Janus kinase inhibitor                                                                                                                                       | Rheumatoid arthritis                                                                                                                 |
| Fingolimod                                          | 1                                 | Sphingosine 1-phosphate receptor modulator                                                                                                                   | Multiple sclerosis                                                                                                                   |
| Ixekizumab                                          | 1                                 | Interleukin-17A antagonist                                                                                                                                   | Plaque psoriasis, psoriatic arthritis                                                                                                |

|    |                                                  |           |                                                                                          |                                                                                                                  |
|----|--------------------------------------------------|-----------|------------------------------------------------------------------------------------------|------------------------------------------------------------------------------------------------------------------|
| 1  |                                                  |           |                                                                                          |                                                                                                                  |
| 2  | Leflunomide                                      | 1         | Pyrimidine synthesis inhibitor                                                           | Rheumatoid arthritis, psoriatic arthritis                                                                        |
| 3  | Pirfenidone                                      | 3         | Not yet known; reduce fibroblasts production                                             | Idiopathic pulmonary fibrosis                                                                                    |
| 4  | Sarilumab                                        | 4         | Interleukin-6 receptor antagonist                                                        | Rheumatoid arthritis                                                                                             |
| 5  |                                                  |           | Not fully known; it has immunomodulatory, antiinflammatory and antiangiogenic properties | Multiple myeloma, erythema nodosum leprosum                                                                      |
| 6  | Thalidomide                                      | 2         |                                                                                          |                                                                                                                  |
| 7  |                                                  |           | Interleukin-6 receptor antagonist                                                        | Rheumatoid arthritis, giant cell arteritis, juvenile idiopathic arthritis, cytokine release syndrome             |
| 8  |                                                  |           |                                                                                          |                                                                                                                  |
| 9  | Tocilizumab                                      | 11        |                                                                                          |                                                                                                                  |
| 10 | <b>Immunostimulants</b>                          | <b>16</b> |                                                                                          |                                                                                                                  |
| 11 |                                                  |           | Recombinant cytokine with antiviral properties                                           | Hepatitis B, hepatitis C, leukaemia, multiple myeloma, follicular lymphoma, carcinoid tumour, malignant melanoma |
| 12 |                                                  |           |                                                                                          |                                                                                                                  |
| 13 | Interferon                                       | 15        |                                                                                          |                                                                                                                  |
| 14 |                                                  |           | Human granulocyte-macrophage colony-stimulating factor                                   | Acute myeloid leukemia, transplantation                                                                          |
| 15 | Sargramostim                                     | 1         |                                                                                          |                                                                                                                  |
| 16 | <b>Anticancer drugs</b>                          | <b>7</b>  |                                                                                          |                                                                                                                  |
| 17 |                                                  |           | Vascular endothelial growth factor-specific angiogenesis inhibitor                       | Several types of cancer; for example, colon, lung, breast                                                        |
| 18 | Bevacizumab                                      | 2         |                                                                                          |                                                                                                                  |
| 19 | Colchicine                                       | 2         | Tubulin disruption                                                                       | Gout flare, familial Mediterranean fever                                                                         |
| 20 | Programmed death receptor-1 (PD-1) antagonists   | 2         | Binds to PD-1 found on T cells, thereby inhibiting T cell proliferation                  | Several types of cancer; for example, melanoma, lung, kidney                                                     |
| 21 | Ruxolitinib                                      | 1         | Janus kinases inhibitor                                                                  | Myelofibrosis, polycythaemia vera                                                                                |
| 22 |                                                  |           |                                                                                          |                                                                                                                  |
| 23 | <b>Plasma</b>                                    | <b>14</b> |                                                                                          |                                                                                                                  |
| 24 |                                                  |           |                                                                                          |                                                                                                                  |
| 25 |                                                  |           |                                                                                          |                                                                                                                  |
| 26 | Dexamethasone                                    | 1         | Apoptosis of multiple myeloma cells                                                      | Multiple myeloma                                                                                                 |
| 27 |                                                  |           | Binds to nuclear receptors to dampen proinflammatory cytokines                           | Several uses; for example, endocrine, rheumatic and collagen disorders                                           |
| 28 | Methylprednisolone                               | 5         |                                                                                          |                                                                                                                  |
| 29 |                                                  |           |                                                                                          | Several autoimmune, infectious, and idiopathic diseases                                                          |
| 30 | <b>Immunoglobulins</b>                           | <b>3</b>  |                                                                                          |                                                                                                                  |
| 31 | <b>Antithrombotic agents</b>                     | <b>3</b>  |                                                                                          |                                                                                                                  |
| 32 | Heparin                                          | 2         | Inactivation of Factor Xa and Factor IIa                                                 | Deep vein thrombosis, pulmonary embolism                                                                         |
| 33 | Enoxaparin                                       | 1         |                                                                                          |                                                                                                                  |
| 34 | <b>Antifibrinolytics (Proteinase inhibitors)</b> | <b>2</b>  |                                                                                          |                                                                                                                  |
| 35 |                                                  |           | Serine protease inhibitor                                                                | Chronic pancreatitis, postoperative reflux esophagitis (Japan)                                                   |
| 36 | Camostat                                         | 1         |                                                                                          |                                                                                                                  |
| 37 | Ulinastat                                        | 1         | Urinary trypsin inhibitor                                                                | Acute pancreatitis, shock (Japan)                                                                                |
| 38 | <b>Expectorants (Mucolytics)</b>                 | <b>2</b>  |                                                                                          |                                                                                                                  |
| 39 |                                                  |           | Mucolytic agent                                                                          | Abnormal, viscid, or inspissated mucous secretions                                                               |
| 40 | Acetylcysteine                                   | 1         |                                                                                          |                                                                                                                  |
| 41 | Bromhexine                                       | 1         | Mucolytic agent                                                                          | Congestion and cough                                                                                             |
| 42 |                                                  |           |                                                                                          |                                                                                                                  |
| 43 |                                                  |           |                                                                                          |                                                                                                                  |
| 44 |                                                  |           |                                                                                          |                                                                                                                  |
| 45 |                                                  |           |                                                                                          |                                                                                                                  |
| 46 |                                                  |           |                                                                                          |                                                                                                                  |
| 47 |                                                  |           |                                                                                          |                                                                                                                  |

|                                                                   |           |                                                                                                 |                                                                                             |
|-------------------------------------------------------------------|-----------|-------------------------------------------------------------------------------------------------|---------------------------------------------------------------------------------------------|
| <b>Other drugs</b>                                                | <b>35</b> |                                                                                                 |                                                                                             |
| Aviptadil                                                         | 1         | Analogue of vasoactive intestinal polypeptide                                                   | Acute lung injury, sarcoidosis (Europe)                                                     |
| Azithromycin                                                      | 1         | Inhibits bacterial protein synthesis                                                            | Mild to moderate infections                                                                 |
| Carrimycin                                                        | 2         | Inhibit protein synthesis by binding to ribosomes of the bacteria                               | Tuberculosis                                                                                |
| Camrelizumab                                                      | 1         | Monoclonal antibody; PD-1 inhibitor                                                             | Refractory classical Hodgkin lymphoma (China)                                               |
| CD24Fc                                                            | 1         | Recombinant fusion protein that targets a novel immune pathway checkpoint                       | Investigational drug                                                                        |
| Dexmedetomidine                                                   | 1         | Selective alpha2-adrenergic agonist                                                             | Sedation                                                                                    |
| Escin                                                             | 2         | Inhibition of an inflammatory response at cellular level                                        | Decongestant, reduction of swelling following injuries                                      |
| GD31 (Nucleoside analog)                                          | 1         | Nucleoside analogues                                                                            | Not found                                                                                   |
| Jakotinib                                                         | 1         | Janus kinase inhibitor                                                                          | Investigational drug (China)                                                                |
| Losartan                                                          | 2         | Angiotensin II receptor blockers                                                                | Hypertension                                                                                |
| Meformin                                                          | 1         | Decreases hepatic production and intestinal absorption of glucose, improves insulin sensitivity | Diabetes Mellitus                                                                           |
| Meplazumab                                                        | 1         | Humanized anti-CD147 antibody                                                                   | Investigational drug                                                                        |
| Nitric oxide                                                      | 5         | Vasodilating agent                                                                              | Hypoxic respiratory failure in neonates                                                     |
| Noscapine                                                         | 1         | Opium alkaloid                                                                                  | Cough suppressant                                                                           |
| PUL-042                                                           | 2         | Agonists of Toll-like receptors                                                                 | Investigational drug                                                                        |
| Polyinosinic-polycytidylic acid                                   | 1         | Upregulation of antitumor genes and the induction of cell apoptosis                             | <b>Possible anticancer activity</b>                                                         |
| Recombinant human angiotensin-converting enzyme 2                 | 1         | Renin-angiotensin system peptidase                                                              | Possible heart failure therapy                                                              |
| Recombinant human interleukin-2                                   | 1         | T cell growth factor                                                                            | Melanoma and renal cell carcinoma                                                           |
| Recombinant human granulocyte colony stimulating factor (rhG-CSF) | 1         | Mediating T cell tolerance                                                                      | Neutrophil-mediated inflammatory disease                                                    |
| Sildenafil (Urologicals)                                          | 1         | Sigma receptor agonist activity                                                                 | Erectile dysfunction                                                                        |
| Suramin (Antiprotozoals)                                          | 1         | Macrofilaricidal                                                                                | African sleeping sickness and river blindness (Africa)                                      |
| Thymosin                                                          | 3         | 5-Da polypeptide hormone                                                                        | Investigational drug for cancer                                                             |
| Tranilast                                                         | 1         | Hematopoietic prostaglandin D synthase inhibitor                                                | bronchial asthma, keloid, hypertrophic scar, and allergic disorders (Japan and South Korea) |
| Triazavirin                                                       | 1         | Guanine nucleotide analogue that inhibits RNA synthesis                                         | Influenza A and B infections (Russia)                                                       |
| <b>Antiviral + Immunosuppressants<sup>d</sup></b>                 | <b>2</b>  |                                                                                                 |                                                                                             |

1  
2  
3  
4  
5  
6  
7  
8  
9  
10  
11  
12  
13  
14  
15  
16  
17  
18  
19  
20  
21  
22  
23  
24  
25  
26  
27  
28  
29  
30  
31  
32  
33  
34  
35  
36  
37  
38  
39  
40  
41  
42  
43  
44  
45  
46  
47

|                                                  |           |
|--------------------------------------------------|-----------|
| <b>Antimalarials + Antibacterial<sup>e</sup></b> | <b>2</b>  |
| <b>Antimalarials + Antivirals<sup>f</sup></b>    | <b>10</b> |
| <b>Antivirals + Interferon<sup>g</sup></b>       | <b>13</b> |
| <b>Other combinations<sup>h</sup></b>            | <b>3</b>  |

<sup>a</sup> Column total exceeds 202 as some trials examine multiple drugs; <sup>b</sup> Ritonavir, cobicistat inhibits CYP3A metabolism and increases blood concentration of the other antiviral drug; <sup>c,d,e,f,g,h</sup> Details on drug combinations are provided in eTable 2; <sup>i</sup> One trial did not specify type of corticosteroid

For peer review only

**Table 3.** Drug Combinations Under Investigation for SARS-COV-2 Infection (n=28 combinations).

|                                                           | Registered trials, N |
|-----------------------------------------------------------|----------------------|
| <b>Different antiviral combinations</b>                   | 7                    |
| Asc09f (Asc09/ritonavir) + oseltamivir                    | 1                    |
| Darunavir/ritonavir + oseltamivir                         | 1                    |
| Favipiravir + lopinavir/ritonavir                         | 1                    |
| Lopinavir/ritonavir + oseltamivir                         | 1                    |
| Lopinavir/ritonavir + emtricitabine/tenofovir             | 1                    |
| Ritonavir + oseltamivir                                   | 1                    |
| Sofosbuvir + daclatasvir                                  | 1                    |
| <b>Immunosuppressants combination</b>                     |                      |
| Tocilizumab + adamumab                                    | 1                    |
| <b>Antiviral + Immunosuppressants</b>                     | 2                    |
| Favipiravir + tocilizumab                                 | 2                    |
| <b>Antimalarials + Antibacterial</b>                      | 2                    |
| Hydroxychloroquine + azithromycin                         | 2                    |
| <b>Antimalarials + Antivirals</b>                         | 10                   |
| Darunavir/cobicistat + hydroxychloroquine                 | 1                    |
| Darunavir/ritonavir + favipiravir + chloroquine           | 1                    |
| Darunavir/ritonavir + oseltamivir + chloroquine           | 1                    |
| Favipiravir + chloroquine                                 | 2                    |
| Hydroxychloroquine + lopinavir or atazanavir/ritonavir    | 1                    |
| Hydroxychloroquine + oseltamivir + lopinavir + interferon | 1                    |
| Lopinavir/ritonavir + chloroquine                         | 1                    |
| Lopinavir/ritonavir + hydroxychloroquine                  | 1                    |
| Oseltamivir + chloroquine                                 | 1                    |
| <b>Antivirals + Interferon</b>                            | 13                   |
| Asc09/ritonavir + interferon                              | 1                    |
| Favipiravir + interferon                                  | 1                    |
| Lopinavir/ritonavir + interferon                          | 6                    |
| Ribavirin + interferon                                    | 2                    |
| Ribavirin + lopinavir/ritonavir + interferon              | 1                    |
| Umifenovir + interferon                                   | 2                    |
| <b>Other combinations</b>                                 | 3                    |
| Darunavir/cobicistat + thymosin                           | 1                    |
| Lopinavir/ritonavir + thymosin                            | 1                    |
| Ebastine + interferon + lopinavir                         | 1                    |

Sources: World Health Organization and ClinicalTrials.gov (as of March 26, 2020)

**eTable 1.** Search Strategy.

|                 |                                                                                                                                                                                                                                                                                                                                                                                                                                                                               |
|-----------------|-------------------------------------------------------------------------------------------------------------------------------------------------------------------------------------------------------------------------------------------------------------------------------------------------------------------------------------------------------------------------------------------------------------------------------------------------------------------------------|
| Search strategy | "COVID-19" OR "COVID 19" OR "COVID19" OR "COVID2019" OR "COVID 2019" OR "COVID-2019" OR "novel coronavirus" OR "new coronavirus" OR "novel corona virus" OR "new corona virus" OR "SARS-CoV-2" OR "SARSCoV2" OR "SARS-CoV2" OR "2019nCoV" OR "2019-nCoV" OR "2019 coronavirus" OR "2019 corona virus" OR "coronavirus disease 2019" OR "severe acute respiratory syndrome coronavirus 2" OR "sars-coronavirus-2" OR "coronavirus disease 2019" OR "corona virus disease 2019" |
|-----------------|-------------------------------------------------------------------------------------------------------------------------------------------------------------------------------------------------------------------------------------------------------------------------------------------------------------------------------------------------------------------------------------------------------------------------------------------------------------------------------|

For peer review only

## REFERENCES

- 1 World Health Organization Dashboard. Available at: <https://experience.arcgis.com/experience/685d0ace521648f8a5beeee1b9125cd> (Accessed April 2, 2020).
- 2 Coronavirus Resource Center. Coronavirus COVID-19 Global Cases by the Center for Systems Science and Engineering. Available at: <https://coronavirus.jhu.edu/data/new-cases> (Accessed April 2, 2020).
- 3 Harrison C. Coronavirus puts drug repurposing on the fast track. Nature Biotechnology. February 27, 2020. Available at: <https://www.nature.com/articles/d41587-020-00003-1> (Accessed April 2, 2020).
- 4 Shen C, Wang Z, Zhao F, et al. Treatment of 5 Critically Ill Patients With COVID-19 With Convalescent Plasma. JAMA. Published online March 27, 2020. doi:10.1001/jama.2020.4783
- 5 Zimmer C. Scientists Identify 69 Drugs To Test Against the Coronavirus. New York Times. March 22, 2020. Available at: <https://www.nytimes.com/2020/03/22/science/coronavirus-drugs-chloroquine.html> (Accessed March 25, 2020).
- 6 The Milken Institute. COVID-19 Treatment and Vaccine Tracker. Available at: <https://milkeninstitute.org/sites/default/files/2020-03/Covid19-Tracker-3-36-20-FINAL.pdf> (Accessed March 25, 2020).
- 7 Garde D. An Updated Guide to the Coronavirus Drugs and Vaccines in Development. STAT News. Available at: <https://www.statnews.com/2020/03/19/an-updated-guide-to-the-coronavirus-drugs-and-vaccines-in-development/> (Accessed March 26, 2020).
- 8 International Clinical Trials Registry Platform (ICTRP). World Health Organization. Available at: <https://www.who.int/ictrp/network/primary/en/> (Accessed March 26, 2020).
- 9 World Health Organization Data Set. International Clinical Trials Registry Platform (ICTRP). Available at: <https://www.who.int/ictrp/network/trds/en/> (Accessed March 25, 2020).
- 10 ClinicalTrials.gov Protocol Registration Data Element Definitions for Interventional and Observational Studies. National Library of Medicine. Available at: <https://prsinfo.clinicaltrials.gov/definitions.html> (Accessed March 25, 2020).
- 11 World Health Organization Database of COVID-19 Trials. Available at: [who.int/ictrp/en/](https://www.who.int/ictrp/en/) (Accessed March 25, 2020).
- 12 ClinicalTrials.gov. National Library of Medicine. Available at: [www.clinicaltrials.gov](https://www.clinicaltrials.gov) (Accessed March 25, 2020).
- 13 European Medicines Agency. Available at: <https://www.ema.europa.eu/en> (Accessed March 25, 2020).
- 14 U.S. Food and Drug Administration. Available at: [FDA.gov](https://www.fda.gov) (Accessed March 25, 2020).



- 15 International Standards for Clinical Trial Registries. World Health Organization. Available at: [https://apps.who.int/iris/bitstream/handle/10665/76705/9789241504294\\_eng.pdf;jsessionid=719FA2FAFABCE205F4CD68277AD9FEAD?sequence=1](https://apps.who.int/iris/bitstream/handle/10665/76705/9789241504294_eng.pdf;jsessionid=719FA2FAFABCE205F4CD68277AD9FEAD?sequence=1) (Accessed March 25, 2020).
- 16 ClinicalTrials.gov Protocol Registration Data Element Definitions for Interventional and Observational Studies. ClinicalTrials.gov. March 7, 2019. Available at: <https://prsinfo.clinicaltrials.gov/definitions.html> (Accessed March 25, 2020).
- 17 Califf RM, Zarin DA, Kramer JM, Sherman RE, Aberle LH, Tasneem A. Characteristics of Clinical Trials Registered in ClinicalTrials.gov, 2007-2010. *JAMA*. 2012;307:1838–1847.
- 18 “UN health chief announces global ‘solidarity trial’ to jumpstart search for COVID-19 treatment.” UN News. March 18, 2020. Available at: <https://news.un.org/en/story/2020/03/1059722> (Accessed April 3, 2020).
- 19 Kupferschmidt K, Cohen J. WHO launches global megatrial of the four most promising coronavirus treatments. *Science*. March 22, 2020. Available at: <https://www.sciencemag.org/news/2020/03/who-launches-global-megatrial-four-most-promising-coronavirus-treatments> (Accessed April 3, 2020).
- 20 Selleck MJ, Senthil M, Wall NR. Making Meaningful Clinical Use of Biomarkers. *Biomark Insights*. 2017;12:1-7.
- 21 Pletcher MJ, Pignone M. Evaluating the clinical utility of a biomarker: a review of methods for estimating health impact. *Circulation*. 2011;123:1116-24.
- 22 Viergever RF, Karam G, Reis A, Ghersi D. The quality of registration of clinical trials: still a problem. *PLoS One*. 2014;9:e84727.
- 23 Tse T, Fain KM, Zarin DA. How to avoid common problems when using ClinicalTrials.gov in research: 10 issues to consider. *BMJ*. 2018;361:k1452
- 24 Apuzzo M, Kirkpatrick DD. Covid-19 Changed How the World Does Science, Together. *New York Times*. April 1, 2020. Available at: <https://www.nytimes.com/2020/04/01/world/europe/coronavirus-science-research-cooperation.html> (Accessed April 1, 2020).

**Figure 1.** Cumulative Number of Registered Clinical Trials of Products for SARS-CoV-2 Infection.

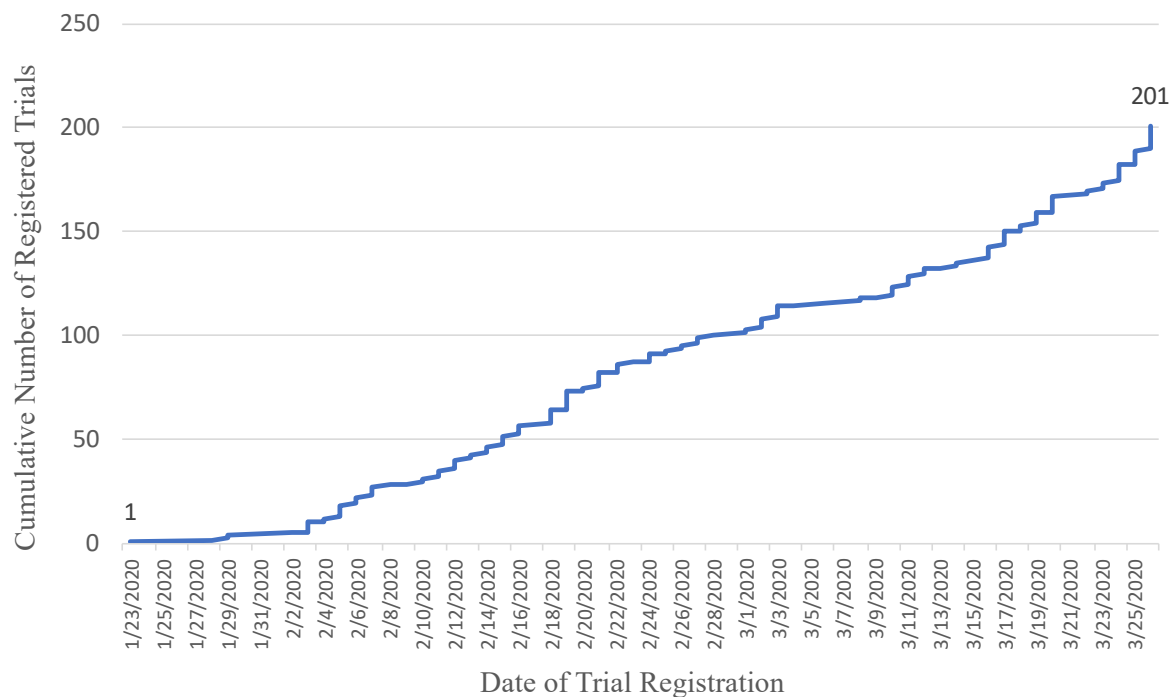

Sources: World Health Organization and ClinicalTrials.gov (as of March 26, 2020)

1  
2  
3  
4  
5  
6  
7  
8  
9  
10  
11  
12  
13  
14  
15  
16  
17  
18  
19  
20  
21  
22  
23  
24  
25  
26  
27  
28  
29  
30  
31  
32  
33  
34  
35  
36  
37  
38  
39  
40  
41  
42  
43  
44  
45  
46  
47

**Figure 2.** Study Designs of Registered Clinical Trials of Products for SARS-CoV-2 Infection (N=201 trials).

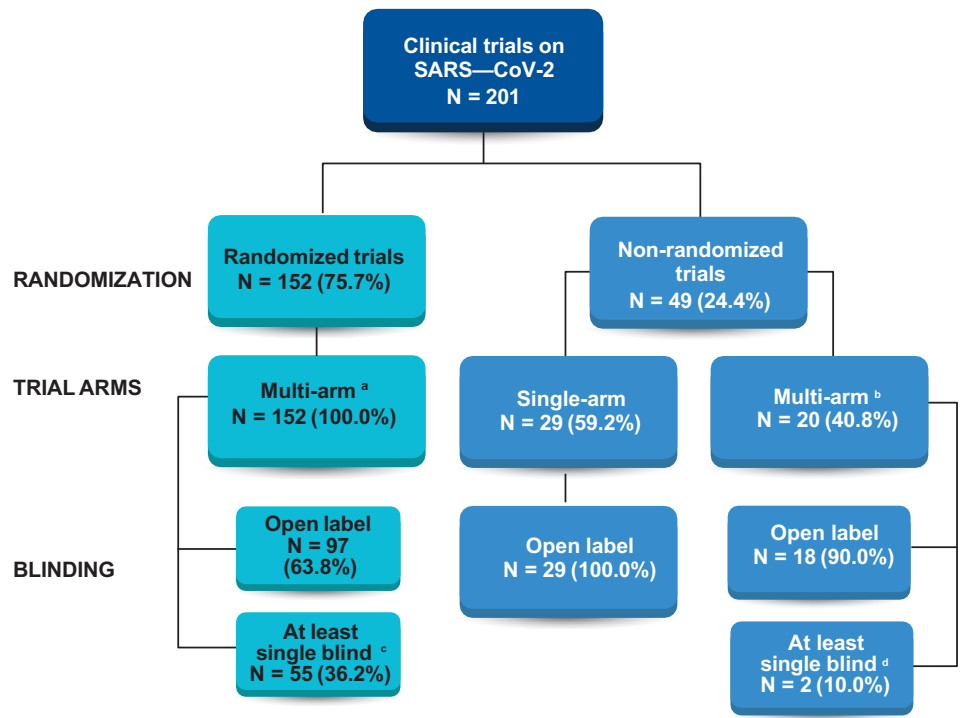

<sup>a</sup> Includes 147 parallel, 1 platform and 4 sequential trials; <sup>b</sup> Includes 1 crossover, 1 factorial, 17 parallel and 1 historical control arm trials;  
<sup>c</sup> Includes 14 single, 5 at least single, 16 double, 2 triple and 18 quadruple blinded trials; <sup>d</sup> Includes 2 double blind trials  
 Sources: World Health Organization and ClinicalTrials.gov (as of March 26, 2020)

## eFigure 1. Study Selection Flowchart

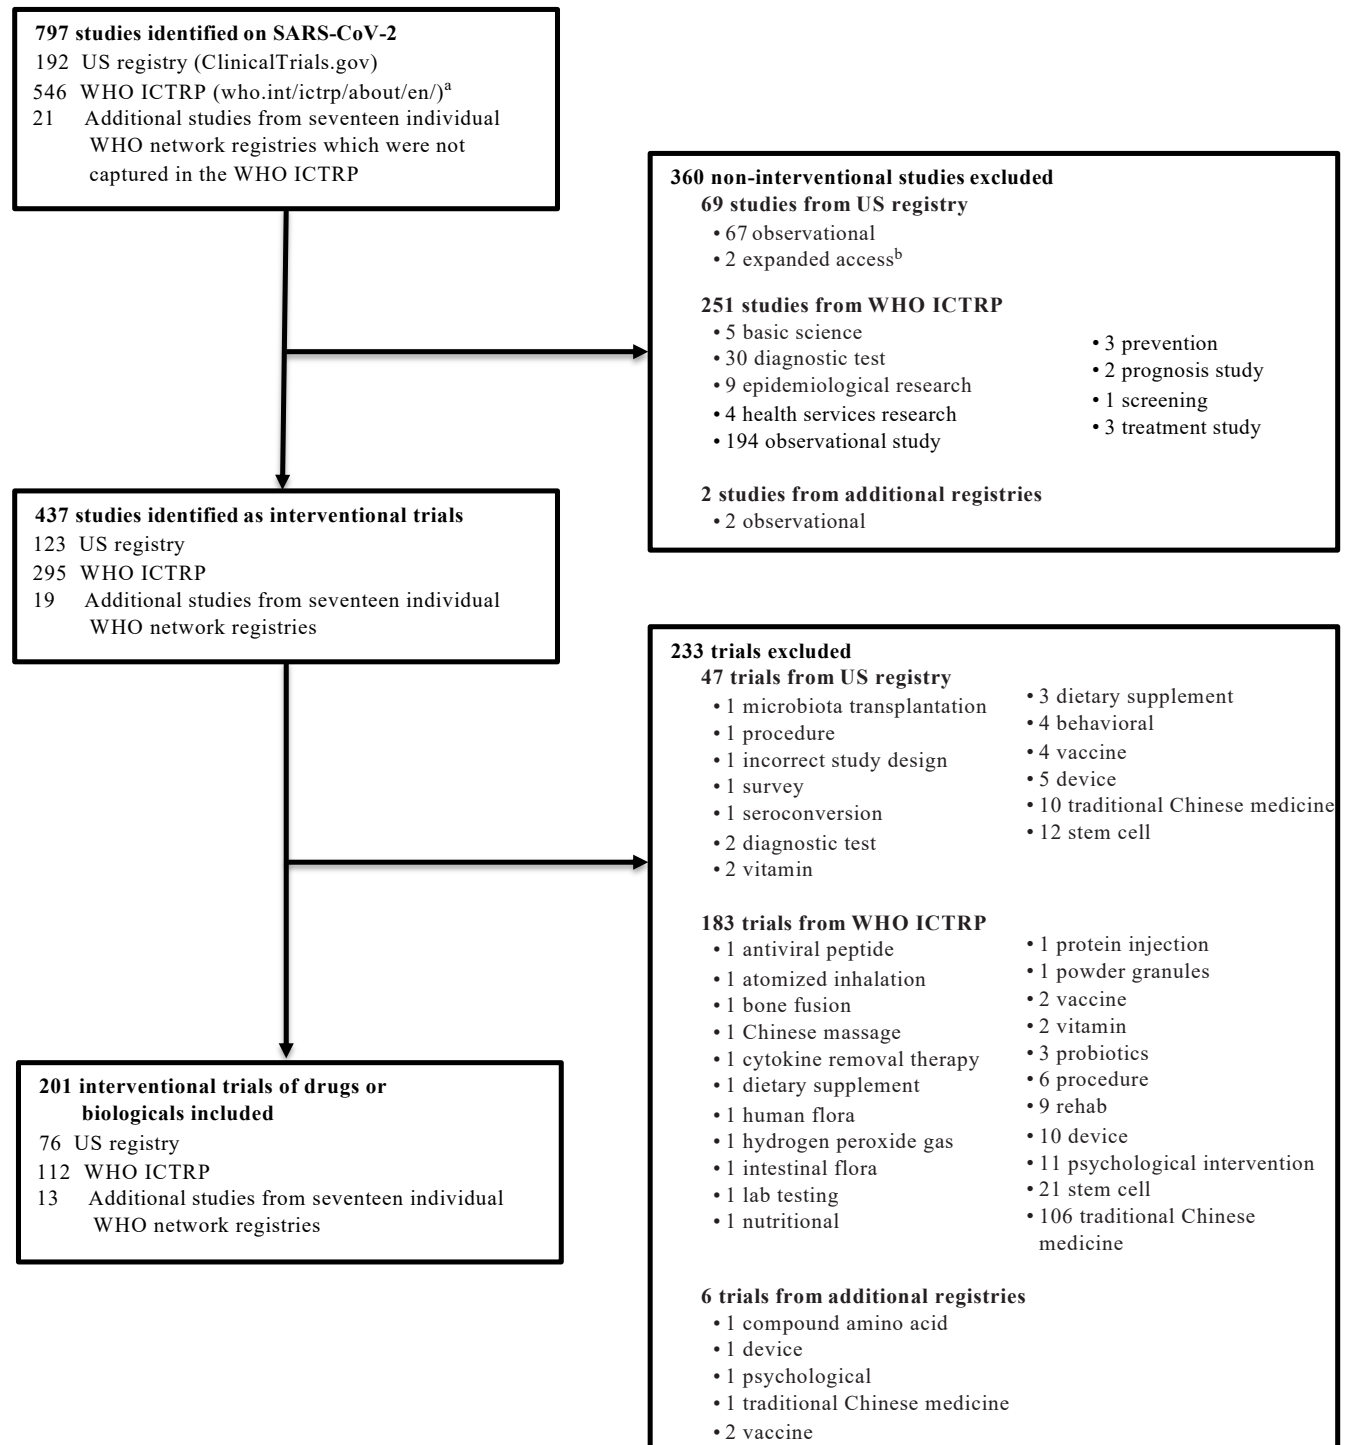

**ICTRP** International Clinical Trials Registry Platform; **WHO** World Health Organization

<sup>a</sup> To avoid double counting we excluded 121 studies which were originally registered in the US registry

<sup>b</sup> Expanded access refers to study designs where investigational drugs are provided to patients who cannot participate in clinical trial

Sources: World Health Organization and ClinicalTrials.gov (as of March 26, 2020)

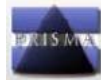

# PRISMA 2009 Checklist

| Section/topic                      | #  | Checklist item                                                                                                                                                                                                                                                                                              | Reported on page # |
|------------------------------------|----|-------------------------------------------------------------------------------------------------------------------------------------------------------------------------------------------------------------------------------------------------------------------------------------------------------------|--------------------|
| <b>TITLE</b>                       |    |                                                                                                                                                                                                                                                                                                             |                    |
| Title                              | 1  | Identify the report as a systematic review, meta-analysis, or both.                                                                                                                                                                                                                                         | 1                  |
| <b>ABSTRACT</b>                    |    |                                                                                                                                                                                                                                                                                                             |                    |
| Structured summary                 | 2  | Provide a structured summary including, as applicable: background; objectives; data sources; study eligibility criteria, participants, and interventions; study appraisal and synthesis methods; results; limitations; conclusions and implications of key findings; systematic review registration number. | 3                  |
| <b>INTRODUCTION</b>                |    |                                                                                                                                                                                                                                                                                                             |                    |
| Rationale                          | 3  | Describe the rationale for the review in the context of what is already known.                                                                                                                                                                                                                              | 4                  |
| Objectives                         | 4  | Provide an explicit statement of questions being addressed with reference to participants, interventions, comparisons, outcomes, and study design (PICOS).                                                                                                                                                  | 4                  |
| <b>METHODS</b>                     |    |                                                                                                                                                                                                                                                                                                             |                    |
| Protocol and registration          | 5  | Indicate if a review protocol exists, if and where it can be accessed (e.g., Web address), and, if available, provide registration information including registration number.                                                                                                                               | Not registered     |
| Eligibility criteria               | 6  | Specify study characteristics (e.g., PICOS, length of follow-up) and report characteristics (e.g., years considered, language, publication status) used as criteria for eligibility, giving rationale.                                                                                                      | 5                  |
| Information sources                | 7  | Describe all information sources (e.g., databases with dates of coverage, contact with study authors to identify additional studies) in the search and date last searched.                                                                                                                                  | 5                  |
| Search                             | 8  | Present full electronic search strategy for at least one database, including any limits used, such that it could be repeated.                                                                                                                                                                               | 5                  |
| Study selection                    | 9  | State the process for selecting studies (i.e., screening, eligibility, included in systematic review, and, if applicable, included in the meta-analysis).                                                                                                                                                   | 5                  |
| Data collection process            | 10 | Describe method of data extraction from reports (e.g., piloted forms, independently, in duplicate) and any processes for obtaining and confirming data from investigators.                                                                                                                                  | 6                  |
| Data items                         | 11 | List and define all variables for which data were sought (e.g., PICOS, funding sources) and any assumptions and simplifications made.                                                                                                                                                                       | 6                  |
| Risk of bias in individual studies | 12 | Describe methods used for assessing risk of bias of individual studies (including specification of whether this was done at the study or outcome level), and how this information is to be used in any data synthesis.                                                                                      | n/a                |
| Summary measures                   | 13 | State the principal summary measures (e.g., risk ratio, difference in means).                                                                                                                                                                                                                               | 7                  |
| Synthesis of results               | 14 | Describe the methods of handling data and combining results of studies, if done, including measures of consistency (e.g., I <sup>2</sup> ) for each meta-analysis.                                                                                                                                          | 7                  |

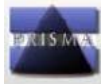

# PRISMA 2009 Checklist

Page 1 of 2

| Section/topic                 | #  | Checklist item                                                                                                                                                                                           | Reported on page # |
|-------------------------------|----|----------------------------------------------------------------------------------------------------------------------------------------------------------------------------------------------------------|--------------------|
| Risk of bias across studies   | 15 | Specify any assessment of risk of bias that may affect the cumulative evidence (e.g., publication bias, selective reporting within studies).                                                             | n/a                |
| Additional analyses           | 16 | Describe methods of additional analyses (e.g., sensitivity or subgroup analyses, meta-regression), if done, indicating which were pre-specified.                                                         | n/a                |
| <b>RESULTS</b>                |    |                                                                                                                                                                                                          |                    |
| Study selection               | 17 | Give numbers of studies screened, assessed for eligibility, and included in the review, with reasons for exclusions at each stage, ideally with a flow diagram.                                          | 7, eFigure 1       |
| Study characteristics         | 18 | For each study, present characteristics for which data were extracted (e.g., study size, PICOS, follow-up period) and provide the citations.                                                             | 7, 8               |
| Risk of bias within studies   | 19 | Present data on risk of bias of each study and, if available, any outcome level assessment (see item 12).                                                                                                | 8                  |
| Results of individual studies | 20 | For all outcomes considered (benefits or harms), present, for each study: (a) simple summary data for each intervention group (b) effect estimates and confidence intervals, ideally with a forest plot. | n/a                |
| Synthesis of results          | 21 | Present results of each meta-analysis done, including confidence intervals and measures of consistency.                                                                                                  | n/a                |
| Risk of bias across studies   | 22 | Present results of any assessment of risk of bias across studies (see Item 15).                                                                                                                          | n/a                |
| Additional analysis           | 23 | Give results of additional analyses, if done (e.g., sensitivity or subgroup analyses, meta-regression [see Item 16]).                                                                                    | 8                  |
| <b>DISCUSSION</b>             |    |                                                                                                                                                                                                          |                    |
| Summary of evidence           | 24 | Summarize the main findings including the strength of evidence for each main outcome; consider their relevance to key groups (e.g., healthcare providers, users, and policy makers).                     | 9, 10              |
| Limitations                   | 25 | Discuss limitations at study and outcome level (e.g., risk of bias), and at review-level (e.g., incomplete retrieval of identified research, reporting bias).                                            | 10                 |
| Conclusions                   | 26 | Provide a general interpretation of the results in the context of other evidence, and implications for future research.                                                                                  | 10                 |
| <b>FUNDING</b>                |    |                                                                                                                                                                                                          |                    |
| Funding                       | 27 | Describe sources of funding for the systematic review and other support (e.g., supply of data); role of funders for the systematic review.                                                               | 1                  |

From: Moher D, Liberati A, Tetzlaff J, Altman DG, The PRISMA Group (2009). Preferred Reporting Items for Systematic Reviews and Meta-Analyses: The PRISMA Statement. PLoS Med 6(6): e1000097. doi:10.1371/journal.pmed1000097

For more information, visit: [www.prisma-statement.org](http://www.prisma-statement.org).

Page 2 of 2  
For peer review only - <http://bmjopen.bmj.com/site/about/guidelines.xhtml>

# BMJ Open

## CHARACTERISTICS OF REGISTERED CLINICAL TRIALS ASSESSING TREATMENTS FOR COVID-19

|                                 |                                                                                                                                                                                                                                                                                                                                                                               |
|---------------------------------|-------------------------------------------------------------------------------------------------------------------------------------------------------------------------------------------------------------------------------------------------------------------------------------------------------------------------------------------------------------------------------|
| Journal:                        | <i>BMJ Open</i>                                                                                                                                                                                                                                                                                                                                                               |
| Manuscript ID                   | bmjopen-2020-039978.R1                                                                                                                                                                                                                                                                                                                                                        |
| Article Type:                   | Original research                                                                                                                                                                                                                                                                                                                                                             |
| Date Submitted by the Author:   | 11-May-2020                                                                                                                                                                                                                                                                                                                                                                   |
| Complete List of Authors:       | Mehta, Hemalkumar; Johns Hopkins University Bloomberg School of Public Health, Epidemiology<br>Ehrhardt, Stephan ; Johns Hopkins University, Department of Epidemiology<br>Moore, Thomas ; Institute for Safe Medication Practices,<br>Segal, Jodi; Johns Hopkins University Bloomberg School of Public Health,<br>Alexander, G Caleb; Johns Hopkins University, Epidemiology |
| <b>Primary Subject Heading</b>: | Global health                                                                                                                                                                                                                                                                                                                                                                 |
| Secondary Subject Heading:      | Public health, Epidemiology                                                                                                                                                                                                                                                                                                                                                   |
| Keywords:                       | EPIDEMIOLOGY, PUBLIC HEALTH, INFECTIOUS DISEASES                                                                                                                                                                                                                                                                                                                              |
|                                 |                                                                                                                                                                                                                                                                                                                                                                               |

SCHOLARONE™  
Manuscripts



I, the Submitting Author has the right to grant and does grant on behalf of all authors of the Work (as defined in the below author licence), an exclusive licence and/or a non-exclusive licence for contributions from authors who are: i) UK Crown employees; ii) where BMJ has agreed a CC-BY licence shall apply, and/or iii) in accordance with the terms applicable for US Federal Government officers or employees acting as part of their official duties; on a worldwide, perpetual, irrevocable, royalty-free basis to BMJ Publishing Group Ltd ("BMJ") its licensees and where the relevant Journal is co-owned by BMJ to the co-owners of the Journal, to publish the Work in this journal and any other BMJ products and to exploit all rights, as set out in our [licence](#).

The Submitting Author accepts and understands that any supply made under these terms is made by BMJ to the Submitting Author unless you are acting as an employee on behalf of your employer or a postgraduate student of an affiliated institution which is paying any applicable article publishing charge ("APC") for Open Access articles. Where the Submitting Author wishes to make the Work available on an Open Access basis (and intends to pay the relevant APC), the terms of reuse of such Open Access shall be governed by a Creative Commons licence – details of these licences and which [Creative Commons](#) licence will apply to this Work are set out in our licence referred to above.

Other than as permitted in any relevant BMJ Author's Self Archiving Policies, I confirm this Work has not been accepted for publication elsewhere, is not being considered for publication elsewhere and does not duplicate material already published. I confirm all authors consent to publication of this Work and authorise the granting of this licence.



## CHARACTERISTICS OF REGISTERED CLINICAL TRIALS ASSESSING TREATMENTS FOR COVID-19

Hemalkumar B. Mehta, PhD<sup>1,2</sup>  
Stephan Ehrhardt, MD, MPH<sup>2</sup>  
Thomas J. Moore, AB<sup>3,4</sup>  
Jodi Segal, MD, MPH<sup>1,2,5</sup>  
G. Caleb Alexander, MD, MS<sup>1,2,5</sup>

1. Center for Drug Safety and Effectiveness, Johns Hopkins Bloomberg School of Public Health, Baltimore, Maryland
2. Department of Epidemiology, Johns Hopkins Bloomberg School of Public Health, Baltimore, Maryland
3. Institute for Safe Medication Practices, Alexandria, Virginia
4. Department of Epidemiology, Milken Institute of Public Health, George Washington University, Washington, DC
5. Department of Medicine, Johns Hopkins University School of Medicine, Baltimore, Maryland

### Support

None

### Disclosure

Dr. Alexander is past Chair of FDA's Peripheral and Central Nervous System Advisory Committee; has served as a paid advisor to IQVIA; is a co-founding Principal and equity holder in Monument Analytics, a health care consultancy whose clients include the life sciences industry as well as plaintiffs in opioid litigation; and is a member of OptumRx's National P&T Committee. This arrangement has been reviewed and approved by Johns Hopkins University in accordance with its conflict of interest policies. HBM, SE, TJM and JS have no disclosures to report.

### Correspondence

G. Caleb Alexander, MD, MS  
Johns Hopkins Bloomberg School of Public Health  
Department of Epidemiology  
615 N. Wolfe Street W6035  
Baltimore, MD 21205  
Phone: 410 955 8168  
Fax: 410 955 0863  
Email: [galexan9@jhmi.edu](mailto:galexan9@jhmi.edu)

### Length

Abstract 366; key points 119; text 2945; references 24; figures 2; efigures 1; tables 3; etables 1

## ABSTRACT

**Objectives.** The SARS-CoV-2 (COVID-19) pandemic has prompted many initiatives to identify safe and efficacious treatments, yet little is known regarding where early efforts have focused. We aimed to characterize registered clinical trials assessing drugs or plasma treatments for COVID-19.

**Design, setting and participants.** Cross-sectional analysis of clinical trials for the treatment of COVID-19 that were registered in the United States or in countries contributing to the World Health Organization's International Clinical Trials Registry Platform (ICTR). Relevant trial entries of drugs or plasma were downloaded on March 26, 2020, de-duplicated, verified with reviews of major medical journals and World Health Organization websites and independently analyzed by two reviewers.

**Main outcome(s).** Trial intervention, sponsorship, critical design elements and specified outcomes

**Results.** Overall 201 clinical trials were registered for testing the therapeutic benefits of 92 drugs or plasma, including 64 in monotherapy and 28 different combinations. Only 8 (5.1%) products or combinations involved new molecular entities. The other test therapies had a wide range of prior medical uses, including as antivirals, antimalarials, immunosuppressants and oncology treatments. In 152 trials (75.7%) patients were randomized to treatment or comparator, including 55 trials with some form of blinding and 97 open label studies. The 49 (24.4%) of trials without a randomized design included 29 single armed studies, and 20 trials with some comparison group. Most trial designs featured multiple endpoints. Clinical endpoints were identified in 134 (66.7%) of trials and included COVID-19 symptoms, death, recovery, required intensive care and hospital discharge. Clinical scales were being used in 33 (16.4%) trials, most often measures of oxygenation and critical illness. Surrogate endpoints or biomarkers were studied in 88 (42.3%) of trials, primarily assays of viral load. Although the trials were initiated in more than 17 countries or regions, 100 (49.8%) were registered in China, and 78 (37.8%) in the U.S. Registered trials increased rapidly, with the number of registered trials doubling from March 1 to March 26, 2020.

**Conclusions.** While accelerating morbidity and mortality from the COVID-19 pandemic has been paralleled by early and rapid clinical investigation, many trials lack features to optimize their scientific value. Global coordination and increased funding of high-quality research may help to maximize scientific progress in rapidly discovering safe and effective treatments.

1  
2 77 **STRENGTHS AND LIMITATIONS**  
3

- 4 78 • We comprehensively assessed the World Health Organization's clinical trials registry network  
5 79 and US clinical trials to identify early clinical trials examining COVID-19 treatments  
6  
7 80 • In addition to identifying investigational therapies, we also characterized the sponsorship, critical design  
8 81 elements and specified outcomes of each registered clinical trial  
9  
10 82 • We also report the pharmacological mechanisms and clinical uses for drugs under investigation  
11  
12 83 • Our analyses was limited to clinical trials of drugs or plasma and many additional trials have  
13 84 been registered since our analysis was performed  
14  
15  
16  
17  
18  
19  
20  
21  
22  
23  
24  
25  
26  
27  
28  
29  
30  
31  
32  
33  
34  
35  
36  
37  
38  
39  
40  
41  
42  
43  
44  
45  
46  
47  
48  
49  
50  
51  
52  
53  
54  
55  
56  
57  
58  
59  
60

## INTRODUCTION

Since its identification in China in late 2019, the epidemic of severe acute respiratory syndrome coronavirus 2 (SARS-CoV-2) has spread rapidly, with 206 countries and territories reporting cases by April 2020.<sup>1</sup> Although knowledge of the coronavirus disease 2019 (COVID-19) pandemic's true epidemiology has been constrained by the limited availability of testing and surveillance, as of April 1, 2020 nearly one million cases had been confirmed around the world, with over 46,000 deaths and the number of new cases doubling as frequently as every few days.<sup>2</sup>

The impact of the pandemic, as well as uncertainty regarding its future course, has unleashed a wave of biomedical research to identify safe and effective treatments for COVID-19. While new molecular entities are under investigation, many therapies previously approved by regulators for the treatment of other diseases are also being evaluated for repurposing for viral suppression or for lessening the inflammatory consequences of infection.<sup>3</sup> There is also interest in assessing the use of convalescent plasma to treat COVID-19.<sup>4</sup>

Both media<sup>5</sup> and industry<sup>6,7</sup> reports have characterized products being assessed for therapeutic activity against COVID-19. We sought to complement these with a rigorous appraisal of early efforts around the world to identify safe and efficacious treatments to address the pandemic. In addition to identifying investigational therapies, we also characterized the sponsorship, critical design elements and specified outcomes of each registered clinical trial. While our analysis represents an early snapshot of a continually evolving area, it nevertheless provides timely and globally important information for researchers, policy-makers and the general public.

## METHODS

### Data Sources

We used information from the World Health Organization's (WHO) clinical trials registry network and ClinicalTrials.gov. ClinicalTrials.gov is a registry of public and privately funded clinical trials conducted around the world maintained by the United States (U.S.) National Library of Medicine on behalf of the National Institutes of Medicine. The WHO registry network includes clinical trials from countries including Australia, Brazil, China, South Korea, India, Cuba, European Union, Germany, Iran, Japan, Lebanon, Thailand, Netherlands, Pan Africa, Peru, Sri Lanka and the United Kingdom.

1  
2 117 Each participating country sends their data to the International Clinical Trials Registry Platform  
3  
4 118 (ICTRP) maintained by the WHO.<sup>8</sup> Both the WHO registry<sup>9</sup> and ClinicalTrials.gov<sup>10</sup> require that  
5  
6 119 registered trials meet specific criteria for content, quality and validity, accessibility, unique  
7  
8 120 identification, technical capacity and administration, and requirements of the International Committee  
9  
10  
11 121 of Medical Journal Editors.

## 12 122 **Registry Searches**

13  
14 124 We downloaded all COVID-19 trials provided by the WHO in a Microsoft Excel spread sheet.<sup>11</sup> The  
15  
16 125 WHO curated all COVID-19 trials published on the ICTRP database in an excel file. Therefore, no  
17  
18 126 search strategy was applied to the ICTRP database. We also performed a manual search of each of the  
19  
20 127 WHO's seventeen network registries, such as EU Clinical trials register to identify additional trials,  
21  
22 128 yielding 21 additional studies. We combined these data with information from the ClincialTrials.gov  
23  
24 129 registry.<sup>12</sup> All searches were last updated on March 26, 2020. To identify trials registered in the U.S.,  
25  
26 130 we searched the ClinicalTrials.gov registry for trials related to the 2019 novel coronavirus using  
27  
28 131 keywords "Coronavirus" or "COVID-19" or "COVID19" or "2019 novel coronavirus" or "2019-  
29  
30 132 nCoV" or "SARS-CoV-2" (**eTable 1**). In order to assess whether there were omitted trials, we also  
31  
32 133 searched major medical journals, such as Lancet, New England Journal of Medicine and JAMA, and  
33  
34 134 websites from the World Health Organization, U.S. Centers for Disease Control and Prevention and  
35  
36 135 media aggregators. These searches did not reveal any additional trials to be included in the analysis.

37  
38 137 For each product that that was approved by regulators, we searched for information from the European  
39  
40 138 Medicines Agency (EMA)<sup>13</sup> and U.S. Food and Drug Administration (FDA)<sup>14</sup> describing mechanisms  
41  
42 139 of action and approved indications. We searched the pharmaceutical manufacturers' websites and other  
43  
44 140 online sources for information about drugs that were not approved in the European Union or the United  
45  
46 141 States.

## 47 142 **Trial Selection**

48  
49 144 We included all studies conducted on patients diagnosed with COVID-19. First, we selected  
50  
51 145 interventional clinical trials based on the "study type" variable (**eFigure 1**). This variable contains  
52  
53 146 values such as interventional trials, observational studies, expanded access, diagnostic test, basic  
54  
55 147 science, prevention, prognosis, epidemiological research, health services research and screening.  
56  
57 148 Interventional studies are "studies that prospectively assign human participants or groups of humans to

1  
2 149 one or more health-related interventions to evaluate the effects on health outcomes<sup>15,16</sup>. To be  
3  
4 150 inclusive of all trials on drugs and plasma, we did not limit our inclusion criteria to randomized trials.  
5  
6 151 Second, we included studies where drugs or plasma was the primary intervention. Since there was not  
7  
8 152 standardized information about the components of each intervention, two individuals (KM, HM)  
9  
10 153 independently reviewed each interventional study to identify any trials of a drug or plasma. Any  
11  
12 154 disagreement was resolved by a third reviewer (GCA). Because study focus was on evaluating drugs  
13  
14 155 or plasma treatments, we excluded trials of stem cell transplants, devices, diagnostic tests, traditional  
15  
16 156 Chinese medicines/herbal medicine, rehabilitation, dietary supplements and psychological  
17  
18 157 interventions. We did not limit any studies based on the outcomes they evaluated. We also excluded  
19  
20 158 one trial with implausible information regarding its study design (a single-arm randomized controlled  
21  
22 159 trial).  
23

### 23 161 **Data extraction and management**

24 162 We extracted the following information from each trial: unique trial number; trial registry source  
25  
26 163 (WHO network registry country or the U.S.), registration date, recruitment status (recruiting, not yet  
27  
28 164 recruiting, withdrawn or cancelled), recruitment country, phase (0, 1, 2, 3, 4, 1-2, 2-3, not applicable,  
29  
30 165 missing), anticipated enrolment, lead sponsor, allocation status (randomized, non-randomized),  
31  
32 166 intervention model (single-arm, parallel, cross-over, factorial, platform trial, sequential), blinding  
33  
34 167 (open, single, double, triple, quadruple,), primary outcome (surrogate/biomarker, clinical scale, clinical  
35  
36 168 outcome) and a website address. Trials that reported recruitment status of completed, active or  
37  
38 169 enrolling by invitation were grouped as recruiting. We used the country address of each facility (i.e., a  
39  
40 170 site that can potentially enroll participants) to identify recruitment countries. Enrolment number  
41  
42 171 reflects the estimated total number of participants to be enrolled or the actual total number of  
43  
44 172 participants enrolled.

45 173  
46 174 We used the primary sponsor and collaborators fields from the U.S. registry, and primary and  
47  
48 175 secondary sponsor fields from the WHO registry to identify the probable lead sponsor. We classified  
49  
50 176 sponsorship as follows: (i) the lead sponsor was considered to be a pharmaceutical company if the  
51  
52 177 primary sponsor was a pharmaceutical company, or a known funding body like the National Institutes  
53  
54 178 of Health (NIH) was neither a primary sponsor or collaborators/secondary sponsor, and at least one  
55  
56 179 collaborator was a pharmaceutical company; (ii) the lead sponsor was a known government research  
57  
58 180 funding agency if identified as such or at least one collaborator was this funder; (iii) the lead sponsor

1  
2 181 was a hospital if so stated; (iv) all others were classified as other. For some trials, the study design or  
3  
4 182 blinding was unclear. In such cases, two reviewers (HM, SE) independently reviewed the registry  
5  
6 183 record in detail and extracted the information. If, after in depth review, study design was still unclear  
7  
8 184 (n=37), we used the following rules to assign intervention model and blinding: (i) trials with a single  
9  
10 185 group were considered as non-randomized and open-label;<sup>17</sup> (ii) trials that reported more than one  
11  
12 186 group were considered having a parallel group design; (iii) trials were considered open-label if blinding  
13  
14 187 was not reported and could not be inferred. We grouped parallel, cross-over, factorial, platform, and  
15  
16 188 sequential intervention trials as multi-arm (>2 trial arms).

17  
18 190 Two reviewers (HM, TM) independently reviewed primary outcomes of all trials and assigned them as  
19  
20 191 surrogate or biomarker, clinical scale, or clinical outcomes. Surrogate or biomarker included any  
21  
22 192 measure of SARS-Cov-2 or any blood test; clinical scales included measures of oxygenation,  
23  
24 193 Sequential Organ Failure Assessment (SOFA) score, National Early Warning Score 2 (NEWS2) score,  
25  
26 194 lung injury score or any measure of pulmonary harms; and clinical outcomes included symptoms,  
27  
28 195 clinical improvement scores, intubation, hospitalization or death. Reviewer disagreement was resolved  
29  
30 196 by discussion and consensus.

31  
32 198 We identified drugs under investigation for COVID-19 from the experimental and/or control arm of  
33  
34 199 each trial, including multiple drugs when they were studied in combination. Because the trial registries  
35  
36 200 did not record drugs in a standardized format, two pharmacist reviewers (HM, SS) independently  
37  
38 201 extracted this information, converting brand names to scientific names and correcting minor spelling  
39  
40 202 errors. We used the WHO's Anatomical Therapeutic Chemical Classification System to classify drugs  
41  
42 203 in major therapeutic or pharmacological subgroups. For the 18 drugs (e.g., remdesivir) that were not  
43  
44 204 included in the WHO's ATC algorithms, we used product information from the European Medicines  
45  
46 205 Agency, U.S. FDA or the companies' websites to characterize the product.

## 47 207 **Analysis**

48  
49 208 We used descriptive statistics to analyze the extracted data. We summarized the characteristics of all  
50  
51 209 included trials using frequency and percentages. We listed unique drugs under investigation and the  
52  
53 210 number of registered clinical trials for each product. We plotted the number of cumulative trials by  
54  
55 211 their registration date. All data was extracted and stored in an open-access Google Sheet document

1  
2 212 ([Link](#)). The study was considered non-human subject research by the Johns Hopkins University  
3  
4 213 Institutional Review Board. We used SAS version 9.4 (SAS Institute Inc.) for all analyses.

#### 5 214 **Patient and public involvement**

7 215 While we did not directly involve patients in the design or conduct of our investigation, our analyses  
8  
9 216 were motivated by a belief that it is important for patients, and the general public, to have accessible,  
10  
11 217 high-quality information regarding the structure and outcomes of clinical trials assessing therapeutics  
12 218 targeting COVID-19.  
13

## 14 219 15 16 220 17 221 **RESULTS**

### 18 222 **Characteristics of Clinical Trials**

19 223 Overall 201 clinical trials were registered for testing the therapeutic benefits of 156 drugs or plasma,  
20  
21 224 including 62 in monotherapy and 92 different combinations (**Table 1**). Although the trials were  
22  
23 225 initiated in more than 17 countries or regions, 100 (49.8%) were registered in China, and 78 (37.8%) in  
24  
25 226 the U.S. Of the 201 trials, 4 (2.0%) were registered in January 2020, 97 (48.2%) in February and 100  
26 227 (49.8%) between March 1<sup>st</sup> and March 26, 2020 (**Figure 1**). Nearly 60% of the trials were recruiting  
27  
28 228 patients, and more than half were sponsored by hospitals or universities (55.2%), while about one in  
29  
30 229 five were sponsored by a government (19.4%) and a similar proportion (17.9%) were industry  
31  
32 230 sponsored.  
33  
34 231

35 232 In 152 trials (75.7%) patients were randomized to treatment or comparator, including 55 trials with  
36  
37 233 some form of blinding and 97 open label studies (**Figure 2**). The 49 (24.4%) of trials without a  
38  
39 234 randomized design included 29 single armed studies, and 20 trials with some comparison group. Of  
40  
41 235 the 201 trials, 54 (26.9%) were parallel group, randomized controlled trials with at least single-  
42  
43 236 blinding.  
44

### 45 237 46 47 238 **Primary Endpoints**

48 239 Most trial designs featured multiple endpoints. Clinical endpoints were identified in 134 (66.7%) of  
49  
50 240 trials and included COVID-19 symptoms, death, recovery, required intensive care and hospital  
51  
52 241 discharge. Clinical scales were being used in 33 (16.4%) trials, most often measures of oxygenation  
53  
54 242 and critical illness assessment instruments. Surrogate endpoints or biomarkers were studied in 88  
55



(42.3%) of trials, primarily assays of viral load. None of the trials assessed patient and public involvement or quality of life as outcome measures.

### Study Size

Overall, the studies projected enrolling a median (IQR) of 100 (IQR, 50-240) patients. Notably 54 (26.9%) of trials sought to enroll 50 or fewer patients. At the other extreme, 94 (46.8%) trials sought to enroll 100 or more patients, with 20 (9.6%) studies anticipating enrollment of 500 or more patients.

### Therapies Under Evaluation

Overall 92 drugs or plasma were under investigation, including 64 in monotherapy and 28 different combinations (**Table 2**). Only 8 (5.1%) products or combinations involved new molecular entities. The other test therapies had a wide range of prior medical uses; 412 (18.8%) were antivirals, 9 (14.1%) immunosuppressants other than corticosteroids, 4 anticancer drugs (6.3%) 3 (4.7%) antimalarials, 2 (3.1%) corticosteroids, 2 (3.1%) immunostimulants and 2 (3.1%) antithrombotic agents. The 28 different combinations including antivirals, antimalarials, immunosuppressants, immunostimulants and antibacterials (**Table 3**). Of these, nine (32%) were antimalarial/antiviral combinations, seven (25%) antiviral/immunosuppressant combination and six (21%) antiviral/interferon combination.

## DISCUSSION

This study characterized the scope, objectives, and content of the current global research program to find effective therapies for COVID-19 as reported to the leading clinical trial registries. These data show that the primary focus of clinical trial research at present is assess whether a wide range of existing therapeutic products might also be effective against acute illnesses caused by the novel SARS-Cov-2 virus. Because one-third of trials exclude clinical endpoints, nearly one half are designed to enroll fewer than 100 patients and two-thirds are open label, many of these studies are likely to yield only preliminary evidence of a given treatment's safety and effectiveness against COVID-19.

Our results indicate that current scientific activity is concentrated in China and the United States, accounting for 87.6% of the studies. Some of the products under investigation, such as remdesivir, have considerable pre-clinical and clinical evidence to support their potential value. In addition to single site trials, several major, multi-site trials of therapies against COVID-19 are also underway. *Solidarity*,

1  
2 275 announced by the World Health Organization on March 20, 2020, is a multi-center, adaptive,  
3  
4 276 randomized, open-label, five arm trial testing remdesivir, chloroquine/hydroxychloroquine,  
5  
6 277 ritonavir/lopinavir and ritonavir/lopinavir with interferon-beta against standard of care in dozens of  
7  
8 278 countries around the globe.<sup>18</sup> *Discovery*, coordinated by France's National Institute of Health and  
9  
10 279 Medical Research (Inserm), is designed as an add-on trial in Europe and will study the same drugs with  
11  
12 280 the exclusion of chloroquine.<sup>19</sup> The vast majority of test therapies have been approved for other uses,  
13  
14 281 although 8 new molecular entities are being assessed, a number that is likely to grow as governments  
15  
16 282 and industry invest in new compounds during the coming months.

17  
18 284 Our findings provide reason for both optimism and caution. Many registered COVID-19 trials have  
19  
20 285 been designed expediently, and while case series and single-arm trials have value and may provide  
21  
22 286 early signals, randomized study designs provide higher quality evidence and will maximize chances for  
23  
24 287 finding effective and safe treatments during this wave of the pandemic. These trial designs, however,  
25  
26 288 need adequate funding as well as scientific leadership, especially as frontline clinicians are tasked with  
27  
28 289 saving lives. In addition, it is important that surrogate outcomes, biomarkers or clinical scales are  
29  
30 290 strongly and directly linked to what matters most for providers and patients, improved chances of  
31  
32 291 recovery from COVID-19.<sup>20,21</sup>

33 293 This study provides early evidence of the benefits of global registries to characterize urgent clinical  
34  
35 294 trial research questions now under investigation. Used wisely by active researchers, these registries can  
36  
37 295 help to identify the most promising avenues for developing new therapies, avoid unnecessary  
38  
39 296 duplication, and define unanswered questions that inevitably arise from early research. The registries  
40  
41 297 also constitute a focal point for developing a more comprehensive program to share protocols and  
42  
43 298 research results. Given the early use of pre-prints prior to peer review and multiple journals publishing  
44  
45 299 results, the global research enterprise needs to enlarge and extend the cooperative effort initiated by  
46  
47 300 these registries.

### 48 302 **Limitations**

49  
50 303 Our analysis was limited to a cross-sectional review of trials registered early in the pandemic with one  
51  
52 304 half the studies registered in the previous month. Many of these studies appeared to be exploratory and  
53  
54 305 not explicitly powered to test a specific drug effect on a pre-specified primary endpoint. In addition,  
55  
56 306 our assessment was limited to drugs and plasma, rather than other treatment modalities under

1  
2 307 investigation. We did not include trials from Health Canada's Clinical Trials Database because this  
3  
4 308 database does not provide relevant details on trial characteristics. However, if trials are reported in US  
5  
6 309 or WHO database, they are included in our study. We did not apply Standard Protocol Items:  
7 310 Recommendations for Interventional Trials (SPIRIT) guideline to evaluate overall quality of clinical  
8  
9 311 trials protocol. Future research can evaluate quality of clinical trials for COVID-19. Finally, our  
10  
11 312 analysis is only as good as the data that it is based on; the International Clinical Trials Registry  
12 313 Platform (ICTRP) gathers information from more than a dozen contributing countries and despite its  
13  
14 314 value, there remain opportunities to improve the consistency and quality of submitted data from both  
15  
16 315 this platform<sup>22</sup> and ClinicalTrials.gov.<sup>23</sup>  
17  
18 316  
19 317  
20

## 21 318 **CONCLUSIONS**

22  
23 319 The global pandemic has galvanized the world's research community, and there are signs of  
24 320 remarkable scientific activity.<sup>24</sup> In this review of clinical trials registered early in course of the  
25  
26 321 pandemic's first wave, we found evidence of rapid clinical investigation of existing antivirals,  
27  
28 322 antimalarials, immunosuppressants and oncology treatments for repurposing against COVID-19.  
29  
30 323 Despite this, many registered trials lack features to optimize their scientific value. Global coordination  
31 324 and increased funding of high-quality research may help to maximize scientific progress in rapidly  
32  
33 325 discovering safe and effective treatments.  
34  
35  
36  
37  
38  
39  
40  
41  
42  
43  
44  
45  
46  
47  
48  
49  
50  
51  
52  
53  
54  
55  
56  
57  
58  
59  
60

1

2 327

**Table 1.** Characteristics of Registered Clinical Trials for SARS-CoV-2 Infection (n=201 trials).

3

4

5

6

7

8

9

10

11

12

13

14

15

16

17

18

19

20

21

22

23

24

25

26

27

28

29

30

31

32

33

34

35

36

37

38

39

40

41

42

43

44

45

46

47

48

49

50

51

52

53

54

55

56

57

58

59

60

| Clinical Trial Characteristics          | Total trials (N = 201) |
|-----------------------------------------|------------------------|
| Trial intervention, n (%)               |                        |
| Drug                                    | 188 (93.5)             |
| Plasma                                  | 13 (6.5)               |
| Trial registry source, n (%)            |                        |
| China                                   | 100 (49.8)             |
| United States                           | 76 (37.8)              |
| Europe Union                            | 9 (4.5)                |
| Iran                                    | 10 (5.0)               |
| Japan                                   | 4 (2.0)                |
| ISRCTN                                  | 2 (1.0)                |
| Status, n (%)                           |                        |
| Recruiting                              | 120 (59.7)             |
| Not yet recruiting                      | 75 (37.3)              |
| Withdrawn                               | 6 (3.0)                |
| Recruitment country, <sup>a</sup> n (%) |                        |
| China                                   | 126 (53.9)             |
| Europe                                  | 31 (13.3)              |
| Asia (Except China)                     | 18 (7.7)               |
| North America                           | 17 (7.3)               |
| Middle East                             | 13 (5.6)               |
| South America                           | 6 (2.6)                |
| Africa                                  | 1 (0.4)                |
| Not reported                            | 22 (9.4)               |
| Phase, n (%)                            |                        |
| 0                                       | 37 (18.4)              |
| 1 or 1/2                                | 5 (2.5)                |
| 2                                       | 32 (15.9)              |
| 2/3                                     | 16 (8.0)               |
| 3                                       | 33 (16.4)              |
| 4                                       | 51 (24.9)              |
| Not applicable                          | 26 (12.9)              |
| Missing                                 | 2 (1.0)                |
| Lead sponsor, n (%)                     |                        |
| Hospitals                               | 111 (55.2)             |
| Industry                                | 36 (17.9)              |
| Government                              | 39 (19.4)              |
| Other <sup>b</sup>                      | 7 (3.5)                |
| Not reported                            | 8 (4.0)                |

<sup>a</sup>Percentages may exceed 100% as categories not mutually exclusive

<sup>b</sup>Includes foundations and disease trial networks

**ISRCTN** International Standard Randomised Controlled Trial Number

Sources: World Health Organization and ClinicalTrials.gov (as of March 26, 2020)

56 328

57

58

59

60

**Table 1 (con't)**

| Anticipated enrolment, n (%) |              |
|------------------------------|--------------|
| Median (IQR)                 | 100 (50-240) |
| ≤50                          | 54 (26.9)    |
| 51-100                       | 53 (26.4)    |
| ≥100                         | 94 (46.8)    |
| Outcome, <sup>a</sup> n (%)  |              |
| Surrogate/biomarker          | 85 (42.3)    |
| Clinical scale               | 33 (16.4)    |
| Clinical outcome             | 134 (66.7)   |

For peer review only

**Table 2.** Products Being Assessed in Registered Clinical Trials for SARS-COV-2 Infection.

| Major drug class and drugs                          | Registered trials, N <sup>a</sup> | Pharmacologic mechanism                                                                                                                                      | Clinical Uses                                                                                                                        |
|-----------------------------------------------------|-----------------------------------|--------------------------------------------------------------------------------------------------------------------------------------------------------------|--------------------------------------------------------------------------------------------------------------------------------------|
| <b>Antimalarials</b>                                | <b>50</b>                         |                                                                                                                                                              |                                                                                                                                      |
| Chloroquine or hydroxychloroquine                   | 49                                | Inhibit certain enzymes by interacting with DNA; possible antiviral effect on SARS-CoV through changing the glycosylation of ACE2 receptor and spike protein | Malaria, extraintestinal amebiasis, lupus erythematosus, rheumatoid Arthritis                                                        |
| Dihydroartemisinin/piperazine                       | 1                                 | Blocks a step in <i>P. falciparum</i> parasite's metabolism needed for its survival                                                                          | Malaria                                                                                                                              |
| <b>Antivirals<sup>b</sup></b>                       | <b>67</b>                         |                                                                                                                                                              |                                                                                                                                      |
| Asc09/ritonavir                                     | 2                                 | HIV-1 protease inhibitor                                                                                                                                     | Investigational drug for HIV (China)                                                                                                 |
| Azvidine                                            | 4                                 | Reverse transcriptase inhibitor                                                                                                                              | Investigational drug for HIV-1                                                                                                       |
| Baloxavir                                           | 2                                 | Polymerase acidic (PA) endonuclease inhibitor                                                                                                                | Influenza                                                                                                                            |
| Danoprevir/ritonavir                                | 4                                 | Danoprevir inhibits hepatitis virus C NS3/4A protease inhibitor;                                                                                             | Investigational drug for Hepatitis C                                                                                                 |
| Darunavir/cobicistat                                | 1                                 | Darunavir inhibits HIV-1 protease enzyme, thus slowing down multiplication of HIV                                                                            | HIV-1                                                                                                                                |
| Favipiravir                                         | 11                                | Inhibits RNA polymerase and prevents replication of the viral genome                                                                                         | Influenza (Japan)                                                                                                                    |
| Lopinavir/ritonavir                                 | 16                                | Lopinavir inhibits HIV-1 protease enzyme, thus slowing down multiplication of HIV                                                                            | HIV-1                                                                                                                                |
| Remdesivir                                          | 10                                | Nucleoside analogue; inhibit the action of RNA polymerase; tested for Ebola, MERS, SARS                                                                      | None; investigational medicine                                                                                                       |
| Ribavirin                                           | 1                                 | Inhibition of viral RNA and protein synthesis                                                                                                                | Hepatitis C                                                                                                                          |
| Oseltamivir                                         | 2                                 | Inhibitor of influenza virus neuraminidase affecting release of viral particles                                                                              | Influenza                                                                                                                            |
| Umifenovir                                          | 6                                 | Inhibits membrane fusion in influenza virus                                                                                                                  | Influenza (Russia and China)                                                                                                         |
| Sofosbuvir/ledipasvir                               | 1                                 | Sofosbuvir inhibits HCV NS5B RNA; ledipasvir inhibits HCV NS5A inhibitor                                                                                     | Hepatitis C                                                                                                                          |
| <b>Different antiviral combinations<sup>c</sup></b> | <b>7</b>                          |                                                                                                                                                              |                                                                                                                                      |
| <b>Immunosuppressants</b>                           | <b>27</b>                         |                                                                                                                                                              |                                                                                                                                      |
| Adalimumab                                          | 1                                 | Blocks tumor necrosis factor – $\alpha$ , thereby reducing inflammation and other symptoms of the disease                                                    | Rheumatoid arthritis, psoriatic arthritis, Juvenile idiopathic arthritis, Crohn's disease, axial spondyloarthritis, Plaque psoriasis |
| Baricitinib                                         | 2                                 | Janus kinase inhibitor                                                                                                                                       | Rheumatoid arthritis                                                                                                                 |
| Fingolimod                                          | 1                                 | Sphingosine 1-phosphate receptor modulator                                                                                                                   | Multiple sclerosis                                                                                                                   |
| Ixekizumab                                          | 1                                 | Interleukin-17A antagonist                                                                                                                                   | Plaque psoriasis, psoriatic arthritis                                                                                                |

|                                                  |           |                                                                                          |                                                                                                                  |
|--------------------------------------------------|-----------|------------------------------------------------------------------------------------------|------------------------------------------------------------------------------------------------------------------|
| Leflunomide                                      | 1         | Pyrimidine synthesis inhibitor                                                           | Rheumatoid arthritis, psoriatic arthritis                                                                        |
| Pirfenidone                                      | 3         | Not yet known; reduce fibroblasts production                                             | Idiopathic pulmonary fibrosis                                                                                    |
| Sarilumab                                        | 4         | Interleukin-6 receptor antagonist                                                        | Rheumatoid arthritis                                                                                             |
| Thalidomide                                      | 2         | Not fully known; it has immunomodulatory, antiinflammatory and antiangiogenic properties | Multiple myeloma, erythema nodosum leprosum                                                                      |
| Tocilizumab                                      | 11        | Interleukin-6 receptor antagonist                                                        | Rheumatoid arthritis, giant cell arteritis, juvenile idiopathic arthritis, cytokine release syndrome             |
| <b>Immunostimulants</b>                          | <b>16</b> |                                                                                          |                                                                                                                  |
| Interferon                                       | 15        | Recombinant cytokine with antiviral properties                                           | Hepatitis B, hepatitis C, leukaemia, multiple myeloma, follicular lymphoma, carcinoid tumour, malignant melanoma |
| Sargramostim                                     | 1         | Human granulocyte-macrophage colony-stimulating factor                                   | Acute myeloid leukemia, transplantation                                                                          |
| <b>Anticancer drugs</b>                          | <b>7</b>  |                                                                                          |                                                                                                                  |
| Bevacizumab                                      | 2         | Vascular endothelial growth factor-specific angiogenesis inhibitor                       | Several types of cancer; for example, colon, lung, breast                                                        |
| Colchicine                                       | 2         | Tubulin disruption                                                                       | Gout flare, familial Mediterranean fever                                                                         |
| Programmed death receptor-1 (PD-1) antagonists   | 2         | Binds to PD-1 found on T cells, thereby inhibiting T cell proliferation                  | Several types of cancer; for example, melanoma, lung, kidney                                                     |
| Ruxolitinib                                      | 1         | Janus kinases inhibitor                                                                  | Myelofibrosis, polycythaemia vera                                                                                |
| <b>Plasma</b>                                    | <b>14</b> |                                                                                          |                                                                                                                  |
| <b>Corticosteroids<sup>i</sup></b>               | <b>7</b>  |                                                                                          |                                                                                                                  |
| Dexamethasone                                    | 1         | Apoptosis of multiple myeloma cells                                                      | Multiple myeloma                                                                                                 |
| Methylprednisolone                               | 5         | Binds to nuclear receptors to dampen proinflammatory cytokines                           | Several uses; for example, endocrine, rheumatic and collagen disorders                                           |
| <b>Immunoglobulins</b>                           | <b>3</b>  |                                                                                          | Several autoimmune, infectious, and idiopathic diseases                                                          |
| <b>Antithrombotic agents</b>                     | <b>3</b>  |                                                                                          |                                                                                                                  |
| Heparin                                          | 2         | Inactivation of Factor Xa and Factor IIa                                                 | Deep vein thrombosis, pulmonary embolism                                                                         |
| Enoxaparin                                       | 1         |                                                                                          |                                                                                                                  |
| <b>Antifibrinolytics (Proteinase inhibitors)</b> | <b>2</b>  |                                                                                          |                                                                                                                  |
| Camostat                                         | 1         | Serine protease inhibitor                                                                | Chronic pancreatitis, postoperative reflux esophagitis (Japan)                                                   |
| Ulinastat                                        | 1         | Urinary trypsin inhibitor                                                                | Acute pancreatitis, shock (Japan)                                                                                |
| <b>Expectorants (Mucolytics)</b>                 | <b>2</b>  |                                                                                          |                                                                                                                  |
| Acetylcysteine                                   | 1         | Mucolytic agent                                                                          | Abnormal, viscid, or inspissated mucous secretions                                                               |
| Bromhexine                                       | 1         | Mucolytic agent                                                                          | Congestion and cough                                                                                             |

|                                                                   |           |                                                                                                 |                                                                                             |
|-------------------------------------------------------------------|-----------|-------------------------------------------------------------------------------------------------|---------------------------------------------------------------------------------------------|
| <b>Other drugs</b>                                                | <b>35</b> |                                                                                                 |                                                                                             |
| Aviptadil                                                         | 1         | Analogue of vasoactive intestinal polypeptide                                                   | Acute lung injury, sarcoidosis (Europe)                                                     |
| Azithromycin                                                      | 1         | Inhibits bacterial protein synthesis                                                            | Mild to moderate infections                                                                 |
|                                                                   |           | Inhibit protein synthesis by binding to ribosomes of the bacteria                               | Tuberculosis                                                                                |
| Carrimycin                                                        | 2         |                                                                                                 |                                                                                             |
|                                                                   |           | Monoclonal antibody; PD-1 inhibitor                                                             | Refractory classical Hodgkin lymphoma (China)                                               |
| Camrelizumab                                                      | 1         |                                                                                                 |                                                                                             |
|                                                                   |           | Recombinant fusion protein that targets a novel immune pathway checkpoint                       | Investigational drug                                                                        |
| CD24Fc                                                            | 1         |                                                                                                 |                                                                                             |
| Dexmedetomidine                                                   | 1         | Selective alpha2-adrenergic agonist                                                             | Sedation                                                                                    |
|                                                                   |           | Inhibition of an inflammatory response at cellular level                                        | Decongestant, reduction of swelling following injuries                                      |
| Escin                                                             | 2         |                                                                                                 |                                                                                             |
| GD31 (Nucleoside analog)                                          | 1         | Nucleoside analogues                                                                            | Not found                                                                                   |
| Jakotinib                                                         | 1         | Janus kinase inhibitor                                                                          | Investigational drug (China)                                                                |
| Losartan                                                          | 2         | Angiotensin II receptor blockers                                                                | Hypertension                                                                                |
|                                                                   |           | Decreases hepatic production and intestinal absorption of glucose, improves insulin sensitivity | Diabetes Mellitus                                                                           |
| Meformin                                                          | 1         |                                                                                                 |                                                                                             |
| Meplazumab                                                        | 1         | Humanized anti-CD147 antibody                                                                   | Investigational drug                                                                        |
| Nitric oxide                                                      | 5         | Vasodilating agent                                                                              | Hypoxic respiratory failure in neonates                                                     |
| Noscapine                                                         | 1         | Opium alkaloid                                                                                  | Cough suppressant                                                                           |
| PUL-042                                                           | 2         | Agonists of Toll-like receptors                                                                 | Investigational drug                                                                        |
|                                                                   |           | Upregulation of antitumor genes and the induction of cell apoptosis                             | <b>Possible anticancer activity</b>                                                         |
| Polyinosinic-polycytidylic acid                                   | 1         |                                                                                                 |                                                                                             |
| Recombinant human angiotensin-converting enzyme 2                 | 1         | Renin-angiotensin system peptidase                                                              | Possible heart failure therapy                                                              |
| Recombinant human interleukin-2                                   | 1         | T cell growth factor                                                                            | Melanoma and renal cell carcinoma                                                           |
| Recombinant human granulocyte colony stimulating factor (rhG-CSF) | 1         | Mediating T cell tolerance                                                                      | Neutrophil-mediated inflammatory disease                                                    |
| Sildenafil (Urologicals)                                          | 1         | Sigma receptor agonist activity                                                                 | Erectile dysfunction                                                                        |
|                                                                   |           | Macrofilaricidal                                                                                | African sleeping sickness and river blindness (Africa)                                      |
| Suramin (Antiprotozoals)                                          | 1         |                                                                                                 |                                                                                             |
| Thymosin                                                          | 3         | 5-Da polypeptide hormone                                                                        | Investigational drug for cancer                                                             |
|                                                                   |           | Hematopoietic prostaglandin D synthase inhibitor                                                | bronchial asthma, keloid, hypertrophic scar, and allergic disorders (Japan and South Korea) |
| Tranilast                                                         | 1         |                                                                                                 |                                                                                             |
|                                                                   |           | Guanine nucleotide analogue that inhibits RNA synthesis                                         | Influenza A and B infections (Russia)                                                       |
| Triazavirin                                                       | 1         |                                                                                                 |                                                                                             |
| <b>Antiviral + Immunosuppressants<sup>d</sup></b>                 | <b>2</b>  |                                                                                                 |                                                                                             |



|                                                  |           |
|--------------------------------------------------|-----------|
| <b>Antimalarials + Antibacterial<sup>e</sup></b> | <b>2</b>  |
| <b>Antimalarials + Antivirals<sup>f</sup></b>    | <b>10</b> |
| <b>Antivirals + Interferon<sup>g</sup></b>       | <b>13</b> |
| <b>Other combinations<sup>h</sup></b>            | <b>3</b>  |

<sup>a</sup> Column total exceeds 202 as some trials examine multiple drugs; <sup>b</sup> Ritonavir, cobicistat inhibits CYP3A metabolism and increases blood concentration of the other antiviral drug; <sup>c,d,e,f,g,h</sup> Details on drug combinations are provided in Table 3; <sup>i</sup> One trial did not specify type of corticosteroid

For peer review only

**Table 3.** Drug Combinations Under Investigation for SARS-COV-2 Infection (n=28 combinations).

|                                                           | Registered trials, N |
|-----------------------------------------------------------|----------------------|
| <b>Different antiviral combinations</b>                   | 7                    |
| Asc09f (Asc09/ritonavir) + oseltamivir                    | 1                    |
| Darunavir/ritonavir + oseltamivir                         | 1                    |
| Favipiravir + lopinavir/ritonavir                         | 1                    |
| Lopinavir/ritonavir + oseltamivir                         | 1                    |
| Lopinavir/ritonavir + emtricitabine/tenofovir             | 1                    |
| Ritonavir + oseltamivir                                   | 1                    |
| Sofosbuvir + daclatasvir                                  | 1                    |
| <b>Immunosuppressants combination</b>                     |                      |
| Tocilizumab + adamumab                                    | 1                    |
| <b>Antiviral + Immunosuppressants</b>                     | 2                    |
| Favipiravir + tocilizumab                                 | 2                    |
| <b>Antimalarials + Antibacterial</b>                      | 2                    |
| Hydroxychloroquine + azithromycin                         | 2                    |
| <b>Antimalarials + Antivirals</b>                         | 10                   |
| Darunavir/cobicistat + hydroxychloroquine                 | 1                    |
| Darunavir/ritonavir + favipiravir + chloroquine           | 1                    |
| Darunavir/ritonavir + oseltamivir + chloroquine           | 1                    |
| Favipiravir + chloroquine                                 | 2                    |
| Hydroxychloroquine + lopinavir or atazanavir/ritonavir    | 1                    |
| Hydroxychloroquine + oseltamivir + lopinavir + interferon | 1                    |
| Lopinavir/ritonavir + chloroquine                         | 1                    |
| Lopinavir/ritonavir + hydroxychloroquine                  | 1                    |
| Oseltamivir + chloroquine                                 | 1                    |
| <b>Antivirals + Interferon</b>                            | 13                   |
| Asc09/ritonavir + interferon                              | 1                    |
| Favipiravir + interferon                                  | 1                    |
| Lopinavir/ritonavir + interferon                          | 6                    |
| Ribavirin + interferon                                    | 2                    |
| Ribavirin + lopinavir/ritonavir + interferon              | 1                    |
| Umifenovir + interferon                                   | 2                    |
| <b>Other combinations</b>                                 | 3                    |
| Darunavir/cobicistat + thymosin                           | 1                    |
| Lopinavir/ritonavir + thymosin                            | 1                    |
| Ebastine + interferon + lopinavir                         | 1                    |

Sources: World Health Organization and ClinicalTrials.gov (as of March 26, 2020)

## **A. Contributorship Statement**

Hemalkumar B. Mehta (HBM) and G. Caleb Alexander (GCA) conceived the study idea. HBM, Stephan Ehrhardt (SE), Thomas J. Moore (TM), Jodi Segal (JS) and GCA contributed to the study design. HBM performed the data collection and analysis. SE and TM contributed to the data collection. HBM and GCA drafted the first version of the manuscript. HBM, SE, TM, JS and GCA critically reviewed the manuscript and approved the final version.

## **B. Competing Interests**

Dr. Alexander is past Chair of FDA's Peripheral and Central Nervous System Advisory Committee; has served as a paid advisor to IQVIA; is a co-founding Principal and equity holder in Monument Analytics, a health care consultancy whose clients include the life sciences industry as well as plaintiffs in opioid litigation; and is a member of OptumRx's National P&T Committee. This arrangement has been reviewed and approved by Johns Hopkins University in accordance with its conflict of interest policies. HBM, SE, TJM and JS have no disclosures to report.

## **C. Funding**

None

## **D. Data Sharing Statement**

Data is stored in an open-access Google Sheet document - [https://docs.google.com/spreadsheets/d/1p\\_229olyi7ft6MCLYXdS4-dkKszjnAiSnLRVO68OLk8/edit#gid=0](https://docs.google.com/spreadsheets/d/1p_229olyi7ft6MCLYXdS4-dkKszjnAiSnLRVO68OLk8/edit#gid=0)

## **E. Acknowledgements**

The authors gratefully acknowledge Kristin Meek, Matthew Tajanlangit and Jamie Heyward for assistance extracting information from trial registries and Sneha Sura for assistance reviewing drug information and data management.

## REFERENCES

- 1 World Health Organization Dashboard. Available at: <https://experience.arcgis.com/experience/685d0ace521648f8a5beeee1b9125cd> (Accessed April 2, 2020).
- 2 Coronavirus Resource Center. Coronavirus COVID-19 Global Cases by the Center for Systems Science and Engineering. Available at: <https://coronavirus.jhu.edu/data/new-cases> (Accessed April 2, 2020).
- 3 Harrison C. Coronavirus puts drug repurposing on the fast track. Nature Biotechnology. February 27, 2020. Available at: <https://www.nature.com/articles/d41587-020-00003-1> (Accessed April 2, 2020).
- 4 Shen C, Wang Z, Zhao F, et al. Treatment of 5 Critically Ill Patients With COVID-19 With Convalescent Plasma. JAMA. Published online March 27, 2020. doi:10.1001/jama.2020.4783
- 5 Zimmer C. Scientists Identify 69 Drugs To Test Against the Coronavirus. New York Times. March 22, 2020. Available at: <https://www.nytimes.com/2020/03/22/science/coronavirus-drugs-chloroquine.html> (Accessed March 25, 2020).
- 6 The Milken Institute. COVID-19 Treatment and Vaccine Tracker. Available at: <https://milkeninstitute.org/sites/default/files/2020-03/Covid19-Tracker-3-36-20-FINAL.pdf> (Accessed March 25, 2020).
- 7 Garde D. An Updated Guide to the Coronavirus Drugs and Vaccines in Development. STAT News. Available at: <https://www.statnews.com/2020/03/19/an-updated-guide-to-the-coronavirus-drugs-and-vaccines-in-development/> (Accessed March 26, 2020).
- 8 International Clinical Trials Registry Platform (ICTRP). World Health Organization. Available at: <https://www.who.int/ictrp/network/primary/en/> (Accessed March 26, 2020).
- 9 World Health Organization Data Set. International Clinical Trials Registry Platform (ICTRP). Available at: <https://www.who.int/ictrp/network/trds/en/> (Accessed March 25, 2020).
- 10 ClinicalTrials.gov Protocol Registration Data Element Definitions for Interventional and Observational Studies. National Library of Medicine. Available at: <https://prsinfo.clinicaltrials.gov/definitions.html> (Accessed March 25, 2020).
- 11 World Health Organization Database of COVID-19 Trials. Available at: [who.int/ictrp/en/](https://www.who.int/ictrp/en/) (Accessed March 25, 2020).
- 12 ClinicalTrials.gov. National Library of Medicine. Available at: [www.clinicaltrials.gov](https://www.clinicaltrials.gov) (Accessed March 25, 2020).
- 13 European Medicines Agency. Available at: <https://www.ema.europa.eu/en> (Accessed March 25, 2020).
- 14 U.S. Food and Drug Administration. Available at: [FDA.gov](https://www.fda.gov) (Accessed March 25, 2020).

- 1  
2  
3 15 International Standards for Clinical Trial Registries. World Health Organization. Available at:  
4 [https://apps.who.int/iris/bitstream/handle/10665/76705/9789241504294\\_eng.pdf;jsessionid=719FA2F](https://apps.who.int/iris/bitstream/handle/10665/76705/9789241504294_eng.pdf;jsessionid=719FA2FAFABCE205F4CD68277AD9FEAD?sequence=1)  
5 [AFABCE205F4CD68277AD9FEAD?sequence=1](https://apps.who.int/iris/bitstream/handle/10665/76705/9789241504294_eng.pdf;jsessionid=719FA2FAFABCE205F4CD68277AD9FEAD?sequence=1) (Accessed March 25, 2020).  
6  
7  
8 16 ClinicalTrials.gov Protocol Registration Data Element Definitions for Interventional and  
9 Observational Studies. ClinicalTrials.gov. March 7, 2019. Available at:  
10 <https://prsinfo.clinicaltrials.gov/definitions.html> (Accessed March 25, 2020).  
11  
12 17 Califf RM, Zarin DA, Kramer JM, Sherman RE, Aberle LH, Tasneem A. Characteristics of Clinical  
13 Trials Registered in ClinicalTrials.gov, 2007-2010. JAMA. 2012;307:1838–1847.  
14  
15 18 “UN health chief announces global ‘solidarity trial’ to jumpstart search for COVID-19 treatment.”  
16 UN News. March 18, 2020. Available at: <https://news.un.org/en/story/2020/03/1059722> (Accessed  
17 April 3, 2020).  
18  
19  
20 19 Kupferschmidt K, Cohen J. WHO launches global megatrial of the four most promising coronavirus  
21 treatments. Science. March 22, 2020. Available at: [https://www.sciencemag.org/news/2020/03/who-](https://www.sciencemag.org/news/2020/03/who-launches-global-megatrial-four-most-promising-coronavirus-treatments)  
22 [launches-global-megatrial-four-most-promising-coronavirus-treatments](https://www.sciencemag.org/news/2020/03/who-launches-global-megatrial-four-most-promising-coronavirus-treatments) (Accessed April 3, 2020).  
23  
24 20 Selleck MJ, Senthil M, Wall NR. Making Meaningful Clinical Use of Biomarkers. Biomark  
25 Insights. 2017;12:1-7.  
26  
27  
28 21 Pletcher MJ, Pignone M. Evaluating the clinical utility of a biomarker: a review of methods for  
29 estimating health impact. Circulation. 2011;123:1116-24.  
30  
31 22 Viergever RF, Karam G, Reis A, Ghersi D. The quality of registration of clinical trials: still a  
32 problem. PLoS One. 2014;9:e84727.  
33  
34 23 Tse T, Fain KM, Zarin DA. How to avoid common problems when using ClinicalTrials.gov in  
35 research: 10 issues to consider. BMJ. 2018;361:k1452  
36  
37  
38 24 Apuzzo M, Kirkpatrick DD. Covid-19 Changed How the World Does Science, Together. New York  
39 Times. April 1, 2020. Available at: [https://www.nytimes.com/2020/04/01/world/europe/coronavirus-](https://www.nytimes.com/2020/04/01/world/europe/coronavirus-science-research-cooperation.html)  
40 [science-research-cooperation.html](https://www.nytimes.com/2020/04/01/world/europe/coronavirus-science-research-cooperation.html)  
41 (Accessed April 1, 2020).  
42  
43  
44  
45  
46  
47  
48  
49  
50  
51  
52  
53  
54  
55  
56  
57  
58  
59  
60

**Figure 1.** Cumulative Number of Registered Clinical Trials of Products for SARS-CoV-2 Infection.

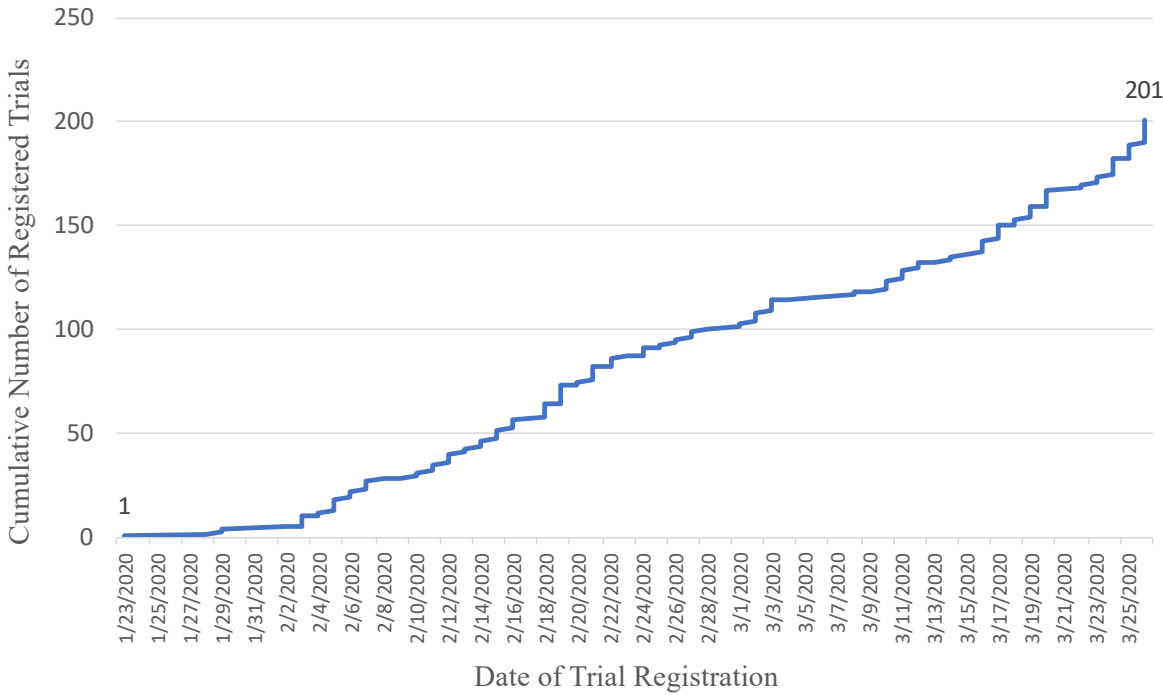

Sources: World Health Organization and ClinicalTrials.gov (as of March 26, 2020)

**Figure 2.** Study Designs of Registered Clinical Trials of Products for SARS-CoV-2 Infection (N=201 trials).

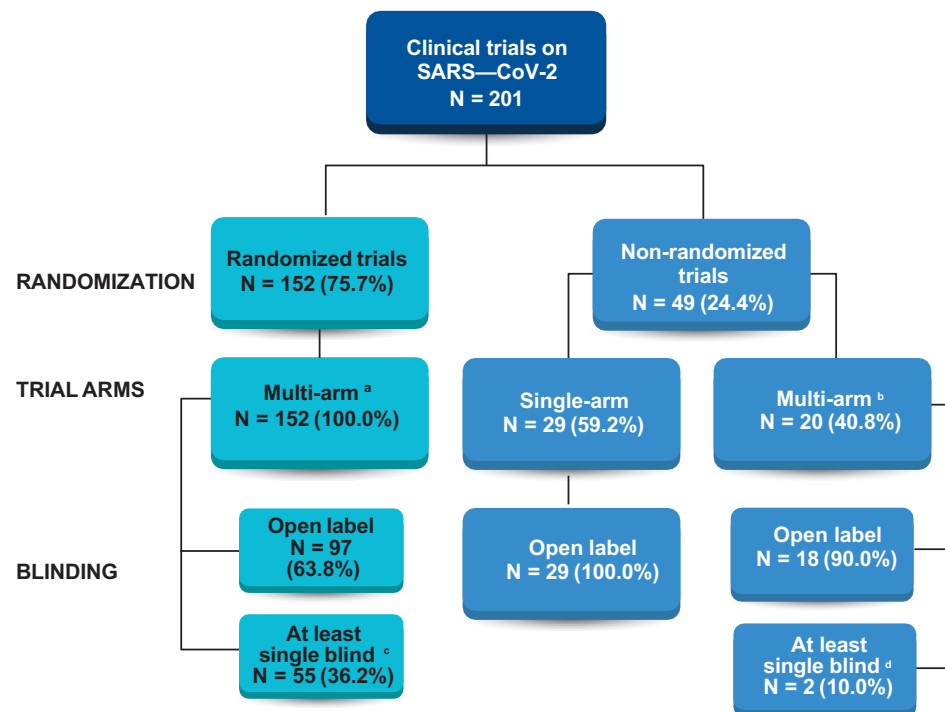

<sup>a</sup> Includes 147 parallel, 1 platform and 4 sequential trials; <sup>b</sup> Includes 1 crossover, 1 factorial, 17 parallel and 1 historical control arm trials;

<sup>c</sup> Includes 14 single, 5 at least single, 16 double, 2 triple and 18 quadruple blinded trials; <sup>d</sup> Includes 2 double blind trials

Sources: World Health Organization and ClinicalTrials.gov (as of March 26, 2020)

## eFigure 1. Study Selection Flowchart

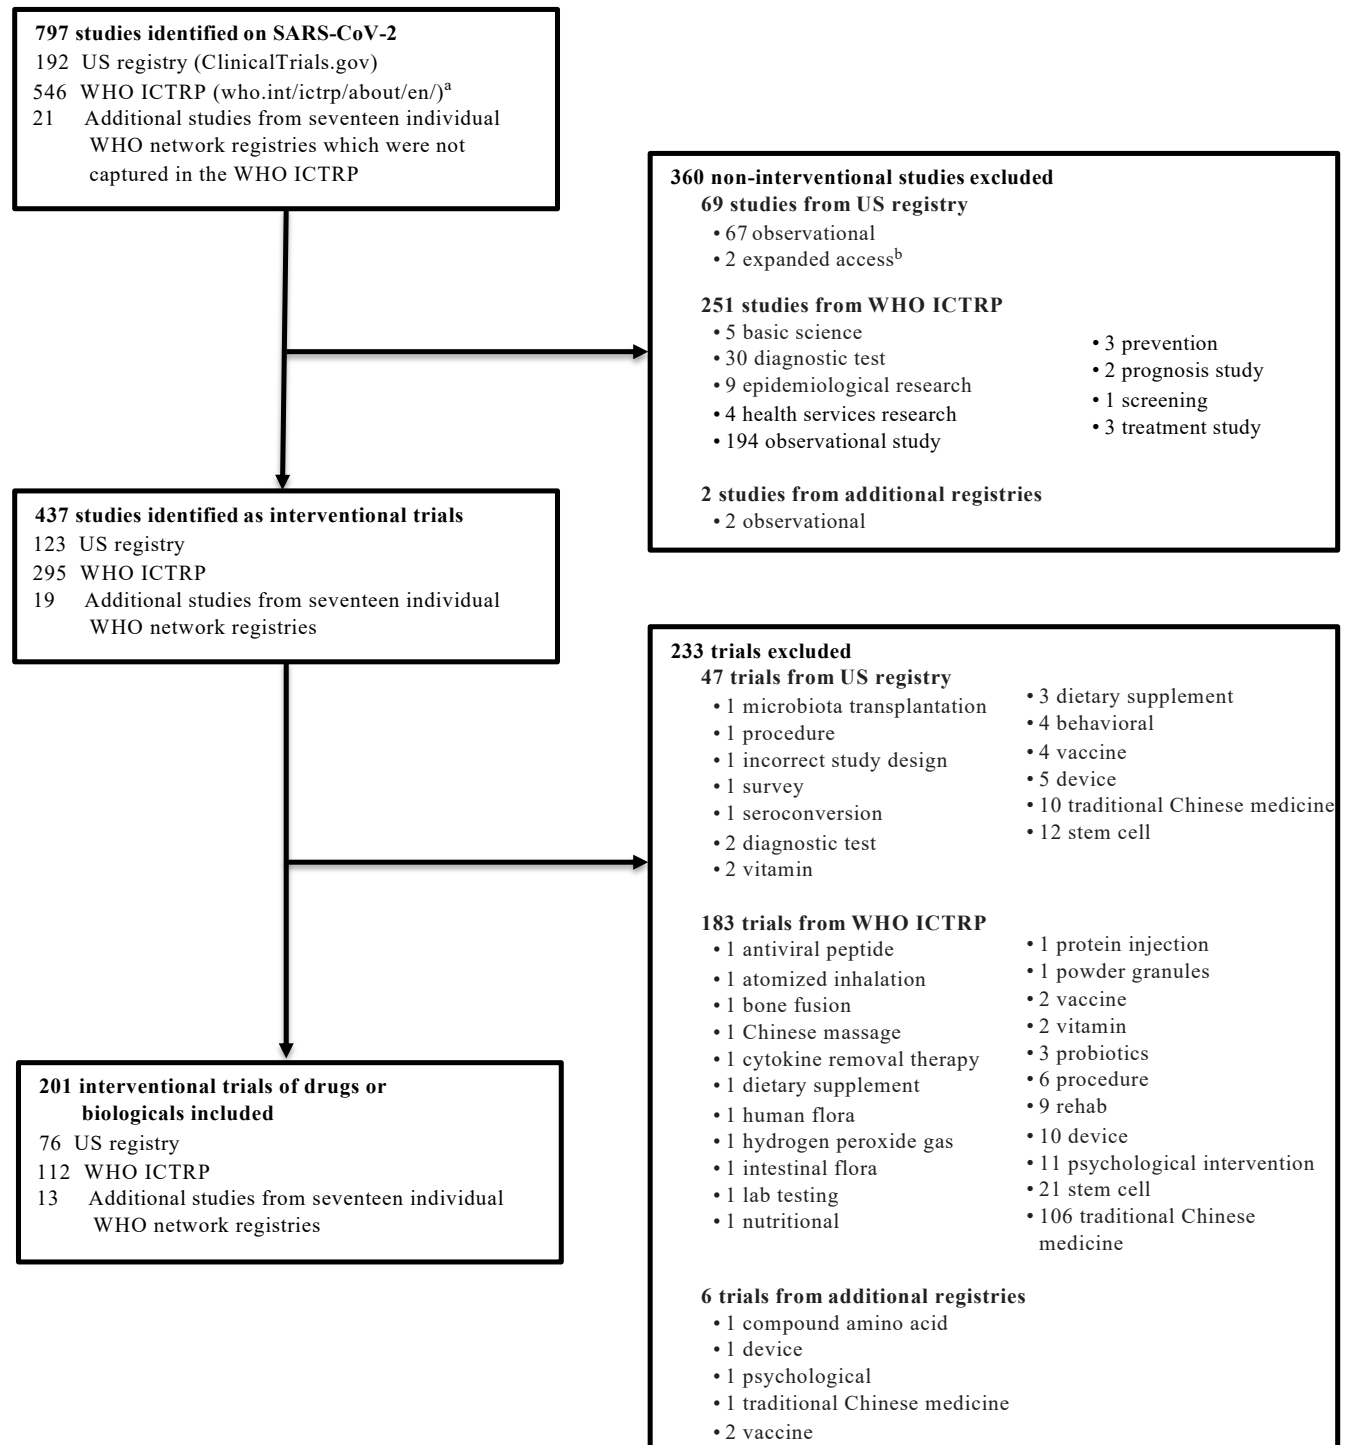

**ICTRP** International Clinical Trials Registry Platform; **WHO** World Health Organization

<sup>a</sup> To avoid double counting we excluded 121 studies which were originally registered in the US registry

<sup>b</sup> Expanded access refers to study designs where investigational drugs are provided to patients who cannot participate in clinical trial

Sources: World Health Organization and ClinicalTrials.gov (as of March 26, 2020)



**eTable 1.** Search Strategy.

|                 |                                                                                                                                                                                                                                                                                                                                                                                                                                                                               |
|-----------------|-------------------------------------------------------------------------------------------------------------------------------------------------------------------------------------------------------------------------------------------------------------------------------------------------------------------------------------------------------------------------------------------------------------------------------------------------------------------------------|
| Search strategy | "COVID-19" OR "COVID 19" OR "COVID19" OR "COVID2019" OR "COVID 2019" OR "COVID-2019" OR "novel coronavirus" OR "new coronavirus" OR "novel corona virus" OR "new corona virus" OR "SARS-CoV-2" OR "SARSCoV2" OR "SARS-CoV2" OR "2019nCoV" OR "2019-nCoV" OR "2019 coronavirus" OR "2019 corona virus" OR "coronavirus disease 2019" OR "severe acute respiratory syndrome coronavirus 2" OR "sars-coronavirus-2" OR "coronavirus disease 2019" OR "corona virus disease 2019" |
|-----------------|-------------------------------------------------------------------------------------------------------------------------------------------------------------------------------------------------------------------------------------------------------------------------------------------------------------------------------------------------------------------------------------------------------------------------------------------------------------------------------|

For peer review only

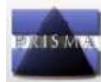

# PRISMA 2009 Checklist

| Section/topic                      | #  | Checklist item                                                                                                                                                                                                                                                                                              | Reported on page # |
|------------------------------------|----|-------------------------------------------------------------------------------------------------------------------------------------------------------------------------------------------------------------------------------------------------------------------------------------------------------------|--------------------|
| <b>TITLE</b>                       |    |                                                                                                                                                                                                                                                                                                             |                    |
| Title                              | 1  | Identify the report as a systematic review, meta-analysis, or both.                                                                                                                                                                                                                                         | 1                  |
| <b>ABSTRACT</b>                    |    |                                                                                                                                                                                                                                                                                                             |                    |
| Structured summary                 | 2  | Provide a structured summary including, as applicable: background; objectives; data sources; study eligibility criteria, participants, and interventions; study appraisal and synthesis methods; results; limitations; conclusions and implications of key findings; systematic review registration number. | 3                  |
| <b>INTRODUCTION</b>                |    |                                                                                                                                                                                                                                                                                                             |                    |
| Rationale                          | 3  | Describe the rationale for the review in the context of what is already known.                                                                                                                                                                                                                              | 4                  |
| Objectives                         | 4  | Provide an explicit statement of questions being addressed with reference to participants, interventions, comparisons, outcomes, and study design (PICOS).                                                                                                                                                  | 4                  |
| <b>METHODS</b>                     |    |                                                                                                                                                                                                                                                                                                             |                    |
| Protocol and registration          | 5  | Indicate if a review protocol exists, if and where it can be accessed (e.g., Web address), and, if available, provide registration information including registration number.                                                                                                                               | Not registered     |
| Eligibility criteria               | 6  | Specify study characteristics (e.g., PICOS, length of follow-up) and report characteristics (e.g., years considered, language, publication status) used as criteria for eligibility, giving rationale.                                                                                                      | 5                  |
| Information sources                | 7  | Describe all information sources (e.g., databases with dates of coverage, contact with study authors to identify additional studies) in the search and date last searched.                                                                                                                                  | 5                  |
| Search                             | 8  | Present full electronic search strategy for at least one database, including any limits used, such that it could be repeated.                                                                                                                                                                               | 5                  |
| Study selection                    | 9  | State the process for selecting studies (i.e., screening, eligibility, included in systematic review, and, if applicable, included in the meta-analysis).                                                                                                                                                   | 5                  |
| Data collection process            | 10 | Describe method of data extraction from reports (e.g., piloted forms, independently, in duplicate) and any processes for obtaining and confirming data from investigators.                                                                                                                                  | 6                  |
| Data items                         | 11 | List and define all variables for which data were sought (e.g., PICOS, funding sources) and any assumptions and simplifications made.                                                                                                                                                                       | 6                  |
| Risk of bias in individual studies | 12 | Describe methods used for assessing risk of bias of individual studies (including specification of whether this was done at the study or outcome level), and how this information is to be used in any data synthesis.                                                                                      | n/a                |
| Summary measures                   | 13 | State the principal summary measures (e.g., risk ratio, difference in means).                                                                                                                                                                                                                               | 7                  |
| Synthesis of results               | 14 | Describe the methods of handling data and combining results of studies, if done, including measures of consistency (e.g., I <sup>2</sup> ) for each meta-analysis.                                                                                                                                          | 7                  |



# PRISMA 2009 Checklist

Page 1 of 2

| Section/topic                 | #  | Checklist item                                                                                                                                                                                           | Reported on page # |
|-------------------------------|----|----------------------------------------------------------------------------------------------------------------------------------------------------------------------------------------------------------|--------------------|
| Risk of bias across studies   | 15 | Specify any assessment of risk of bias that may affect the cumulative evidence (e.g., publication bias, selective reporting within studies).                                                             | n/a                |
| Additional analyses           | 16 | Describe methods of additional analyses (e.g., sensitivity or subgroup analyses, meta-regression), if done, indicating which were pre-specified.                                                         | n/a                |
| <b>RESULTS</b>                |    |                                                                                                                                                                                                          |                    |
| Study selection               | 17 | Give numbers of studies screened, assessed for eligibility, and included in the review, with reasons for exclusions at each stage, ideally with a flow diagram.                                          | 7, eFigure 1       |
| Study characteristics         | 18 | For each study, present characteristics for which data were extracted (e.g., study size, PICOS, follow-up period) and provide the citations.                                                             | 7, 8               |
| Risk of bias within studies   | 19 | Present data on risk of bias of each study and, if available, any outcome level assessment (see item 12).                                                                                                | 8                  |
| Results of individual studies | 20 | For all outcomes considered (benefits or harms), present, for each study: (a) simple summary data for each intervention group (b) effect estimates and confidence intervals, ideally with a forest plot. | n/a                |
| Synthesis of results          | 21 | Present results of each meta-analysis done, including confidence intervals and measures of consistency.                                                                                                  | n/a                |
| Risk of bias across studies   | 22 | Present results of any assessment of risk of bias across studies (see Item 15).                                                                                                                          | n/a                |
| Additional analysis           | 23 | Give results of additional analyses, if done (e.g., sensitivity or subgroup analyses, meta-regression [see Item 16]).                                                                                    | 8                  |
| <b>DISCUSSION</b>             |    |                                                                                                                                                                                                          |                    |
| Summary of evidence           | 24 | Summarize the main findings including the strength of evidence for each main outcome; consider their relevance to key groups (e.g., healthcare providers, users, and policy makers).                     | 9, 10              |
| Limitations                   | 25 | Discuss limitations at study and outcome level (e.g., risk of bias), and at review-level (e.g., incomplete retrieval of identified research, reporting bias).                                            | 10                 |
| Conclusions                   | 26 | Provide a general interpretation of the results in the context of other evidence, and implications for future research.                                                                                  | 10                 |
| <b>FUNDING</b>                |    |                                                                                                                                                                                                          |                    |
| Funding                       | 27 | Describe sources of funding for the systematic review and other support (e.g., supply of data); role of funders for the systematic review.                                                               | 1                  |

From: Moher D, Liberati A, Tetzlaff J, Altman DG, The PRISMA Group (2009). Preferred Reporting Items for Systematic Reviews and Meta-Analyses: The PRISMA Statement. PLoS Med 6(6): e1000097. doi:10.1371/journal.pmed1000097

For more information, visit: [www.prisma-statement.org](http://www.prisma-statement.org).
