# Supplementary material for: Characteristics of registered clinical trials assessing treatments for COVID-19: a cross-sectional analysis
Source: PubMed Central journal article supplement — BMJ Open. 2020 Jun 9;10(6):e039978. doi: 10.1136/bmjopen-2020-039978 (PMC7286283; doi:10.1136/bmjopen-2020-039978), 2020-06-09
Supplement: bmjopen-2020-039978supp001.pdf [file bmjopen-2020-039978supp001.pdf]

**eTable 1.** Search Strategy.

|                 |                                                                                                                                                                                                                                                                                                                                                                                                                                                                               |
|-----------------|-------------------------------------------------------------------------------------------------------------------------------------------------------------------------------------------------------------------------------------------------------------------------------------------------------------------------------------------------------------------------------------------------------------------------------------------------------------------------------|
| Search strategy | "COVID-19" OR "COVID 19" OR "COVID19" OR "COVID2019" OR "COVID 2019" OR "COVID-2019" OR "novel coronavirus" OR "new coronavirus" OR "novel corona virus" OR "new corona virus" OR "SARS-CoV-2" OR "SARSCoV2" OR "SARS-CoV2" OR "2019nCoV" OR "2019-nCoV" OR "2019 coronavirus" OR "2019 corona virus" OR "coronavirus disease 2019" OR "severe acute respiratory syndrome coronavirus 2" OR "sars-coronavirus-2" OR "coronavirus disease 2019" OR "corona virus disease 2019" |
|-----------------|-------------------------------------------------------------------------------------------------------------------------------------------------------------------------------------------------------------------------------------------------------------------------------------------------------------------------------------------------------------------------------------------------------------------------------------------------------------------------------|
