# Supplementary material for: Characteristics of registered clinical trials assessing treatments for COVID-19: a cross-sectional analysis
Source: PubMed Central journal article supplement — BMJ Open. 2020 Jun 9;10(6):e039978. doi: 10.1136/bmjopen-2020-039978 (PMC7286283; doi:10.1136/bmjopen-2020-039978), 2020-06-09
Supplement: bmjopen-2020-039978supp002.pdf [file bmjopen-2020-039978supp002.pdf]

## eFigure 1. Study Selection Flowchart

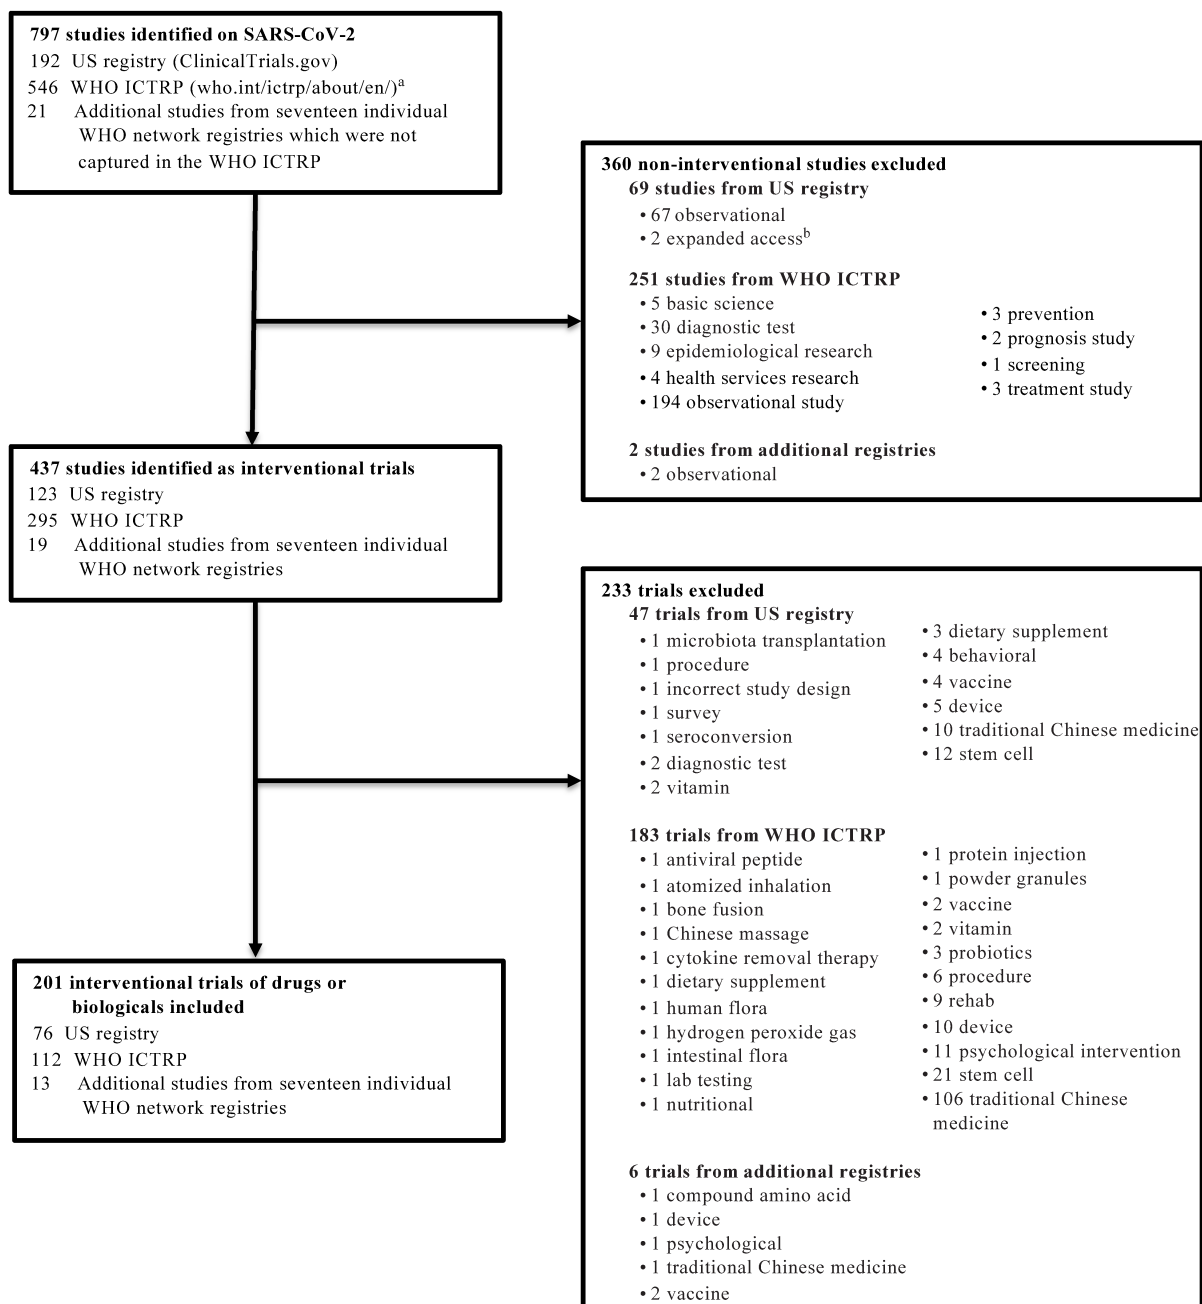

ICTRP International Clinical Trials Registry Platform; WHO World Health Organization

<sup>a</sup>To avoid double counting we excluded 121 studies which were originally registered in the US registry

<sup>b</sup>Expanded access refers to study designs where investigational drugs are provided to patients who cannot participate in clinical trial

Sources: World Health Organization and ClinicalTrials.gov (as of March 26, 2020)
